# Supplementary material for: Natural Genetic Variation for Growth and Development Revealed by High-Throughput Phenotyping in Arabidopsis thaliana
Source: PubMed Central journal article supplement (PMC3276187; doi:10.1534/g3.111.001487), 2012-01-01

## Rosette Area Data Summary

Each page in the .pdf file present 6x6 plants from one flat. Some plants grown along the border of a flat were out of focus and were not included here. In each of the four environments plants were grown in four flats, two placed on top shelf and two placed on bottom shelf. (1) Plants in the two flats within Spain spring bottom shelf grew quite differently from those within top shelf. Thus only two flats within top shelf in Spain spring were analyzed in GWAS. (2) Plants in the two flats within Spain summer top shelf had a significant amount of missing images. Thus only two flats within bottom shelf in Spain summer were analyzed in GWAS. (3) A proportion of plants flowered very early in Sweden spring, leaving short developmental frame to be analyzed. Particularly plants grown in the two flats within Sweden spring bottom shelf were thinned very late. For Sweden summer, green labels were applied for many flats which made the estimation of rosette area unreliable. Thus the Sweden data were not analyzed in GWAS.

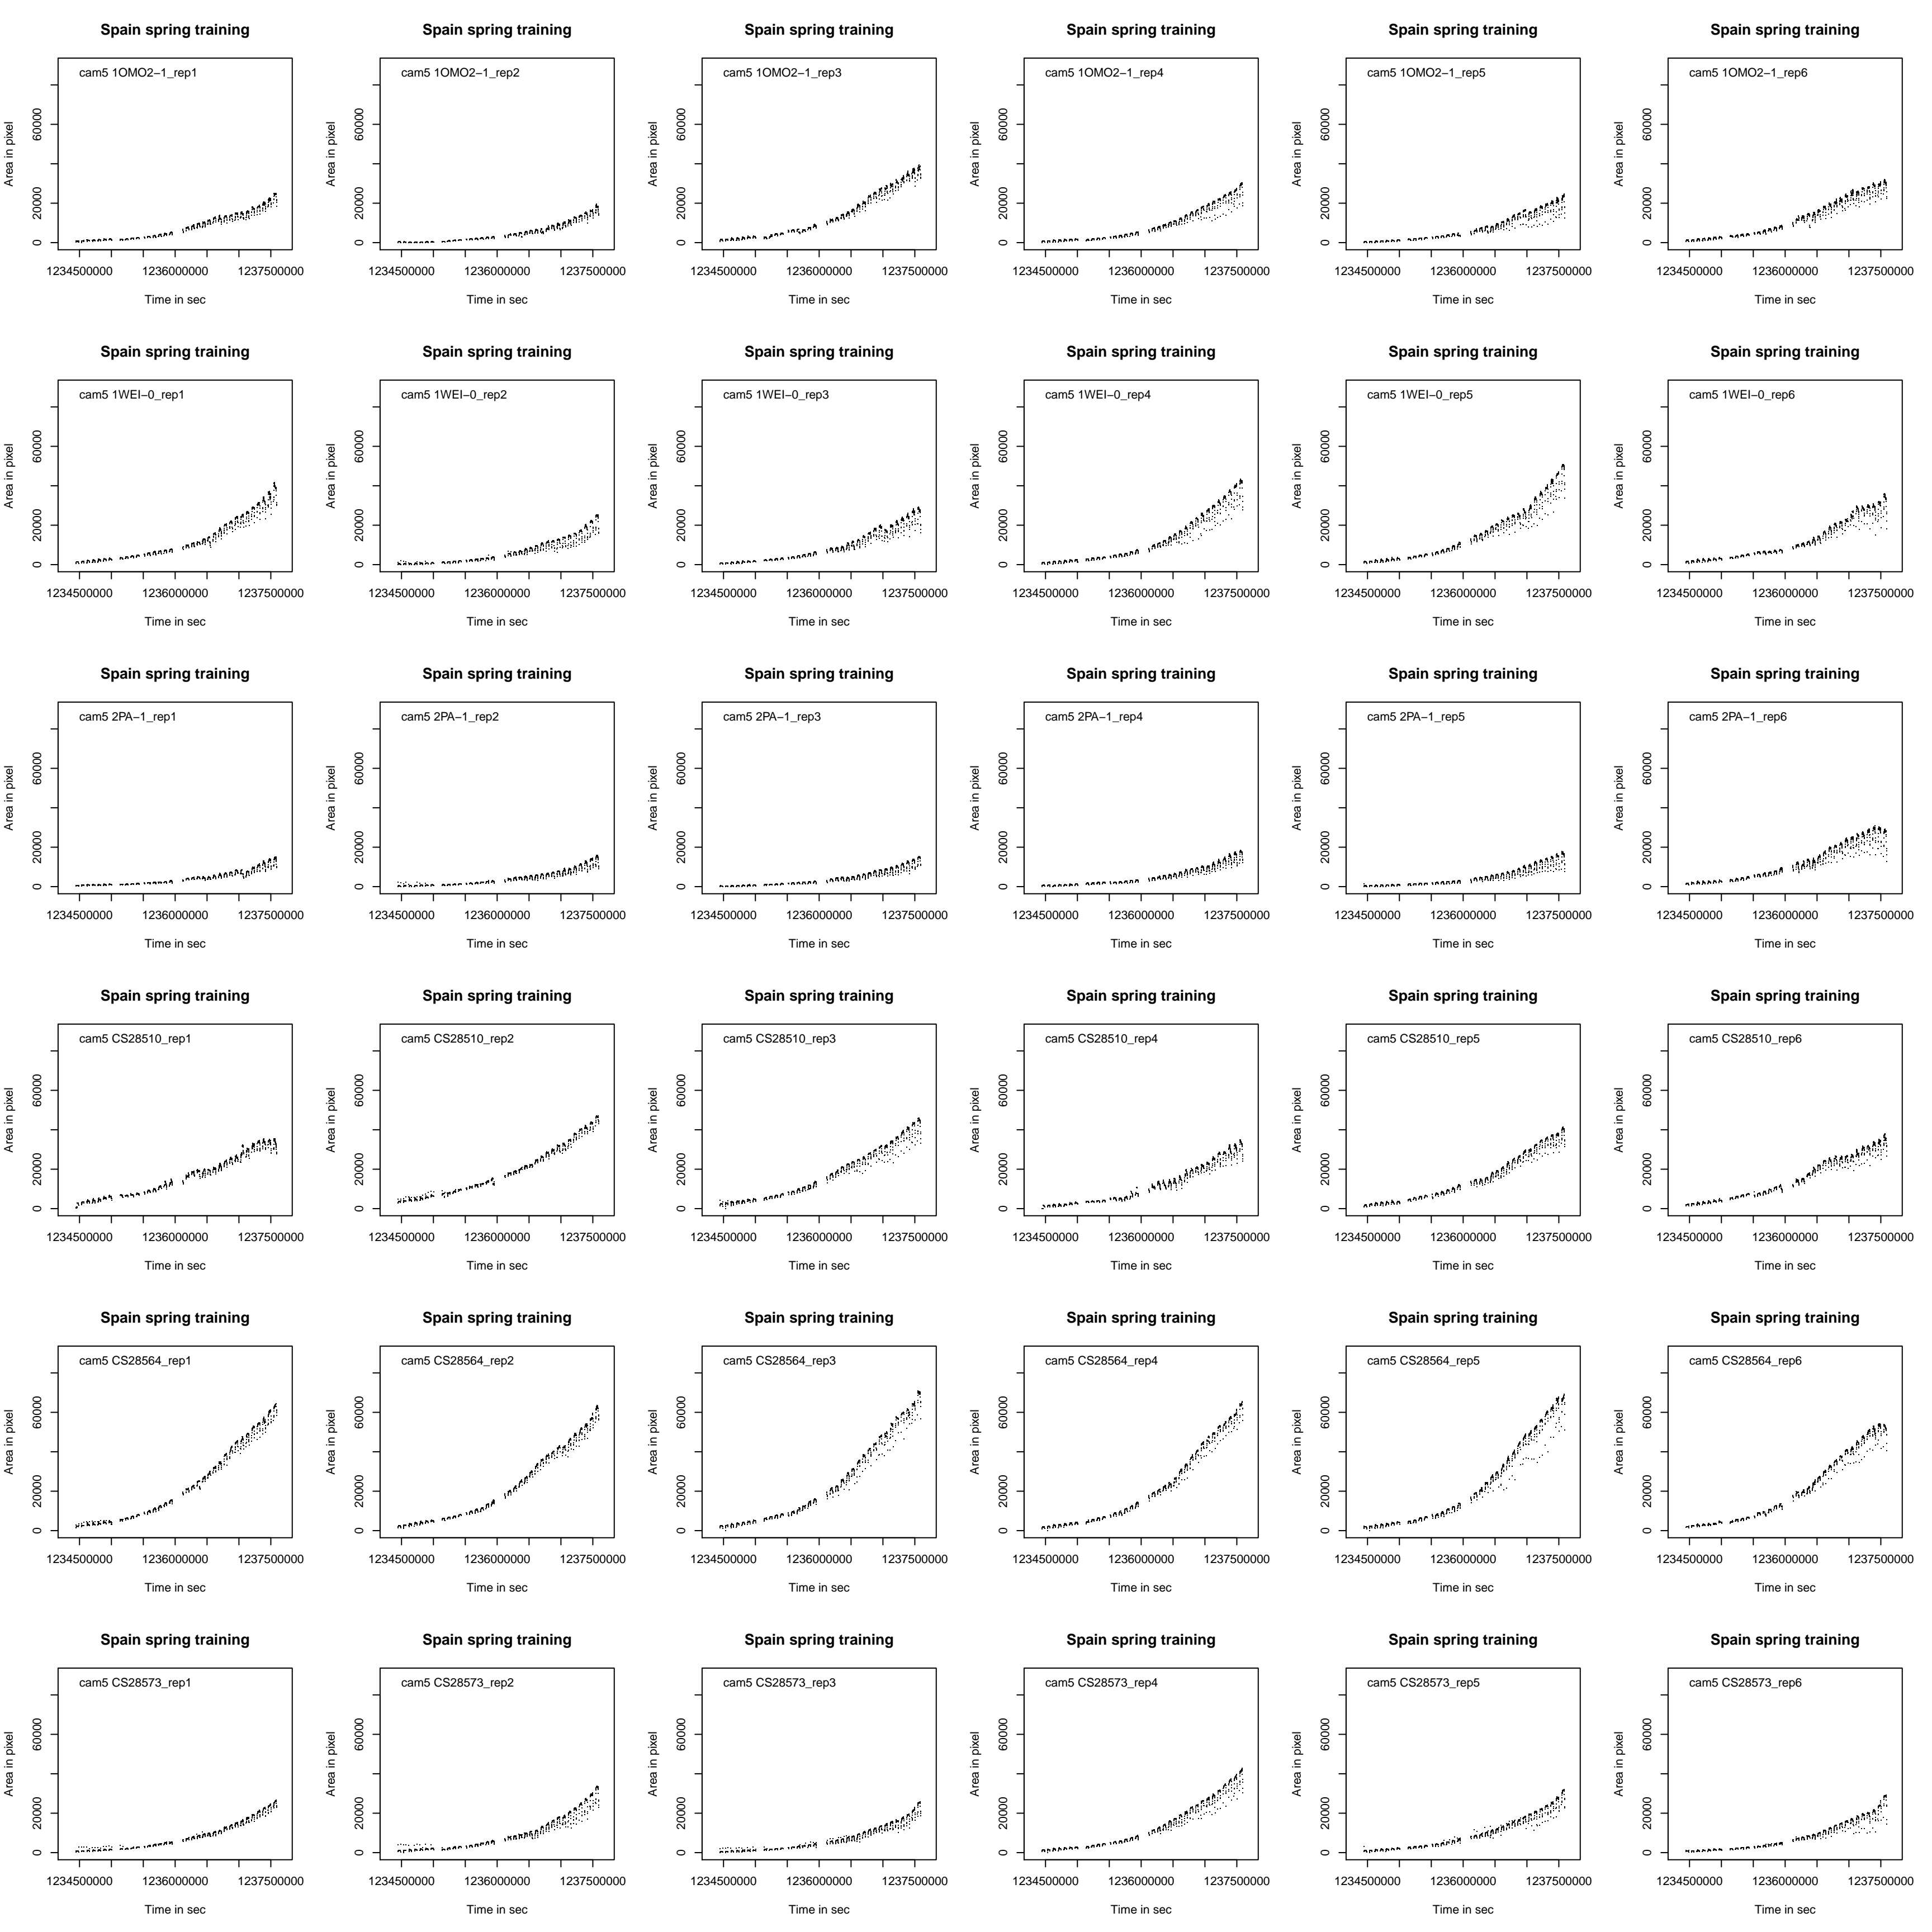

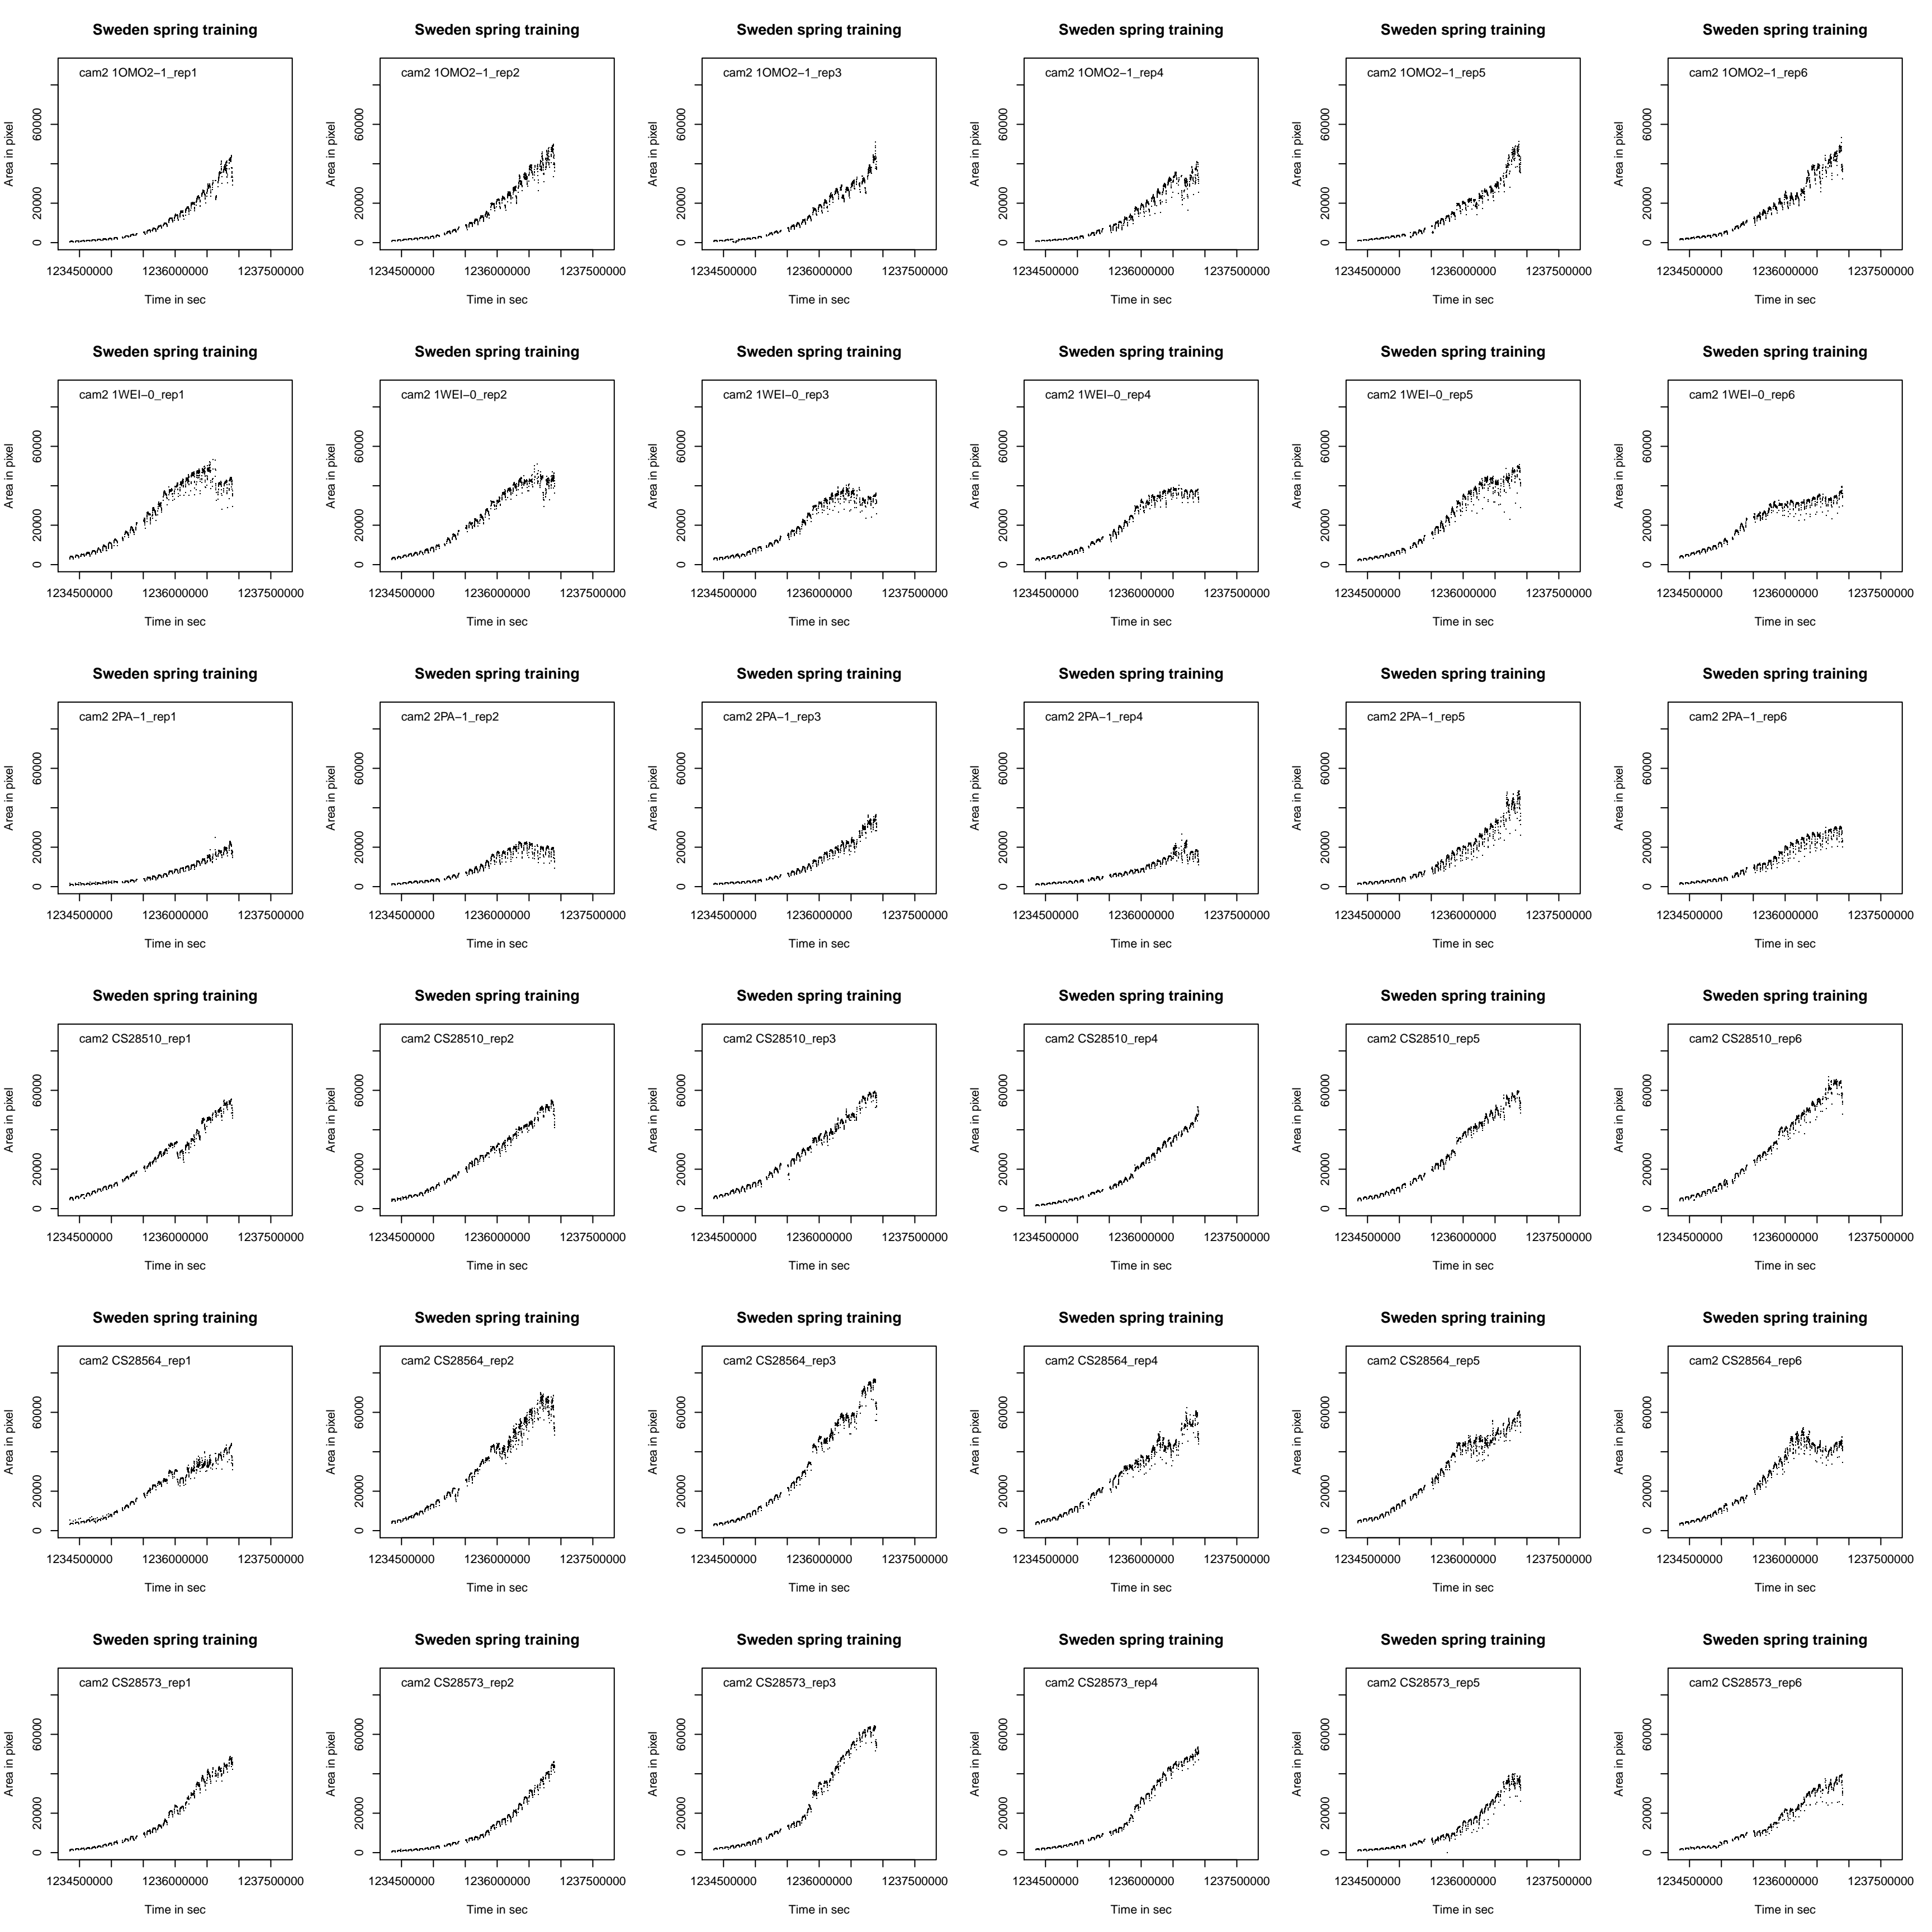

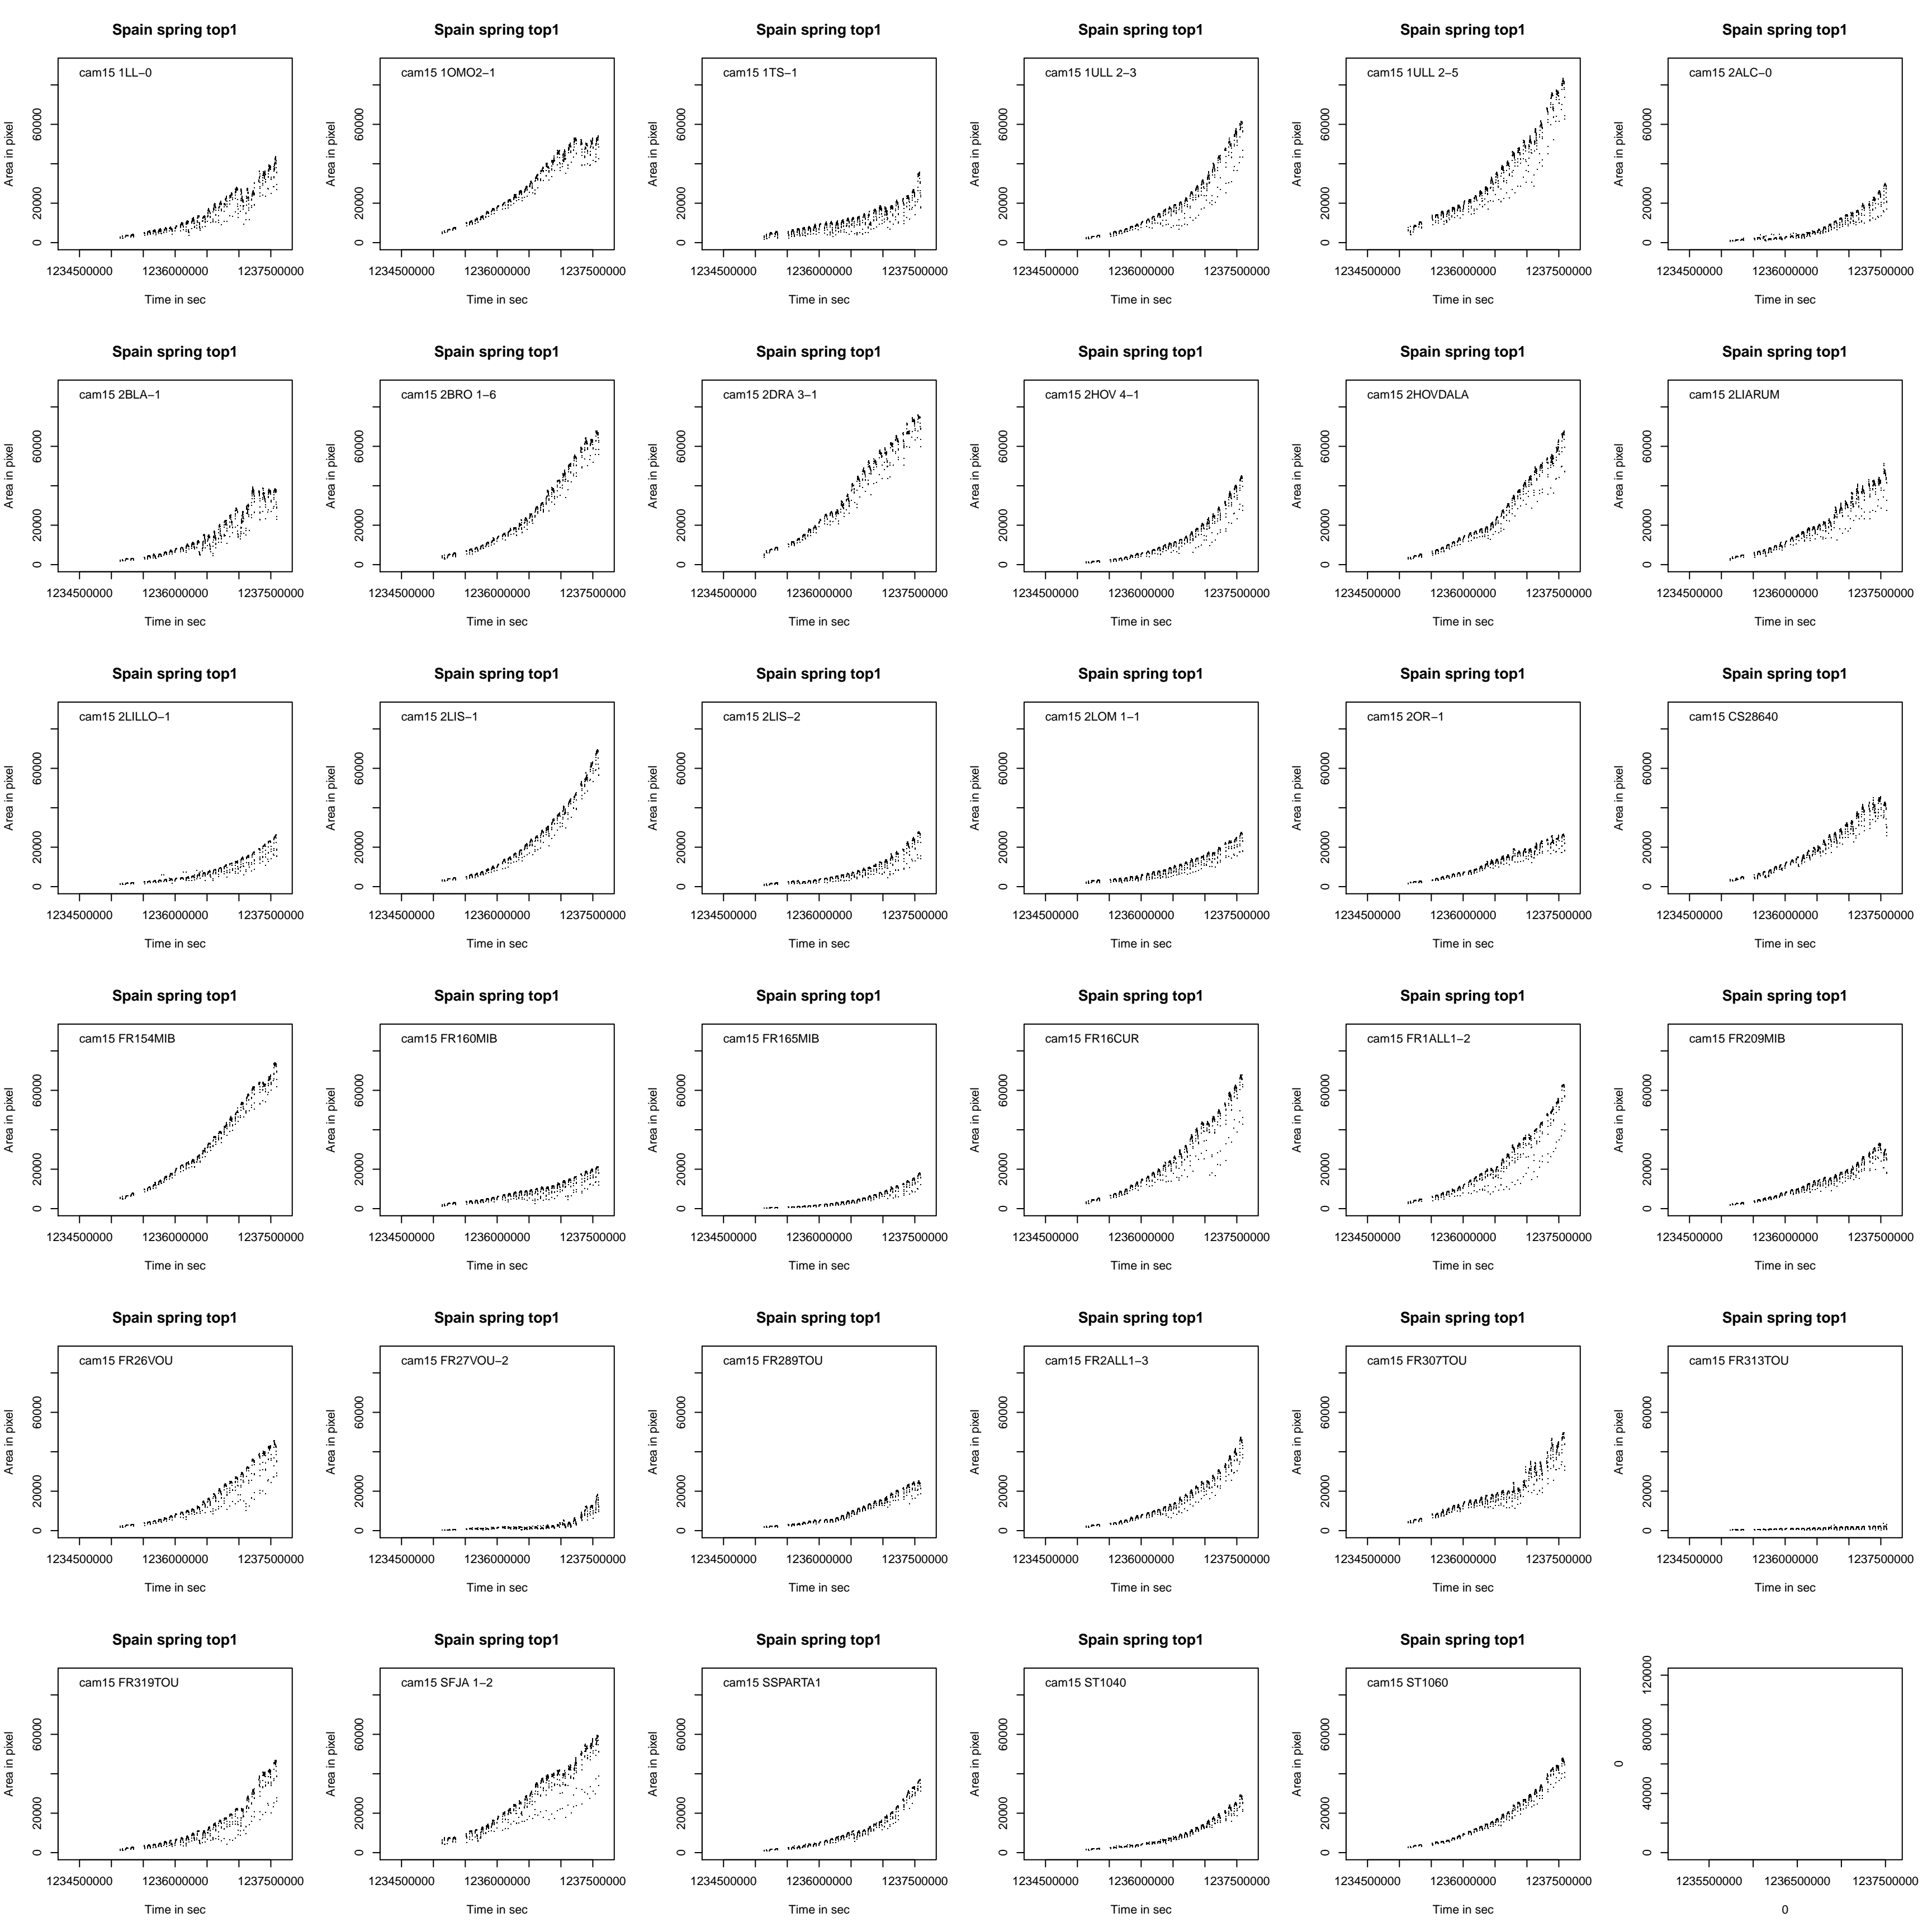

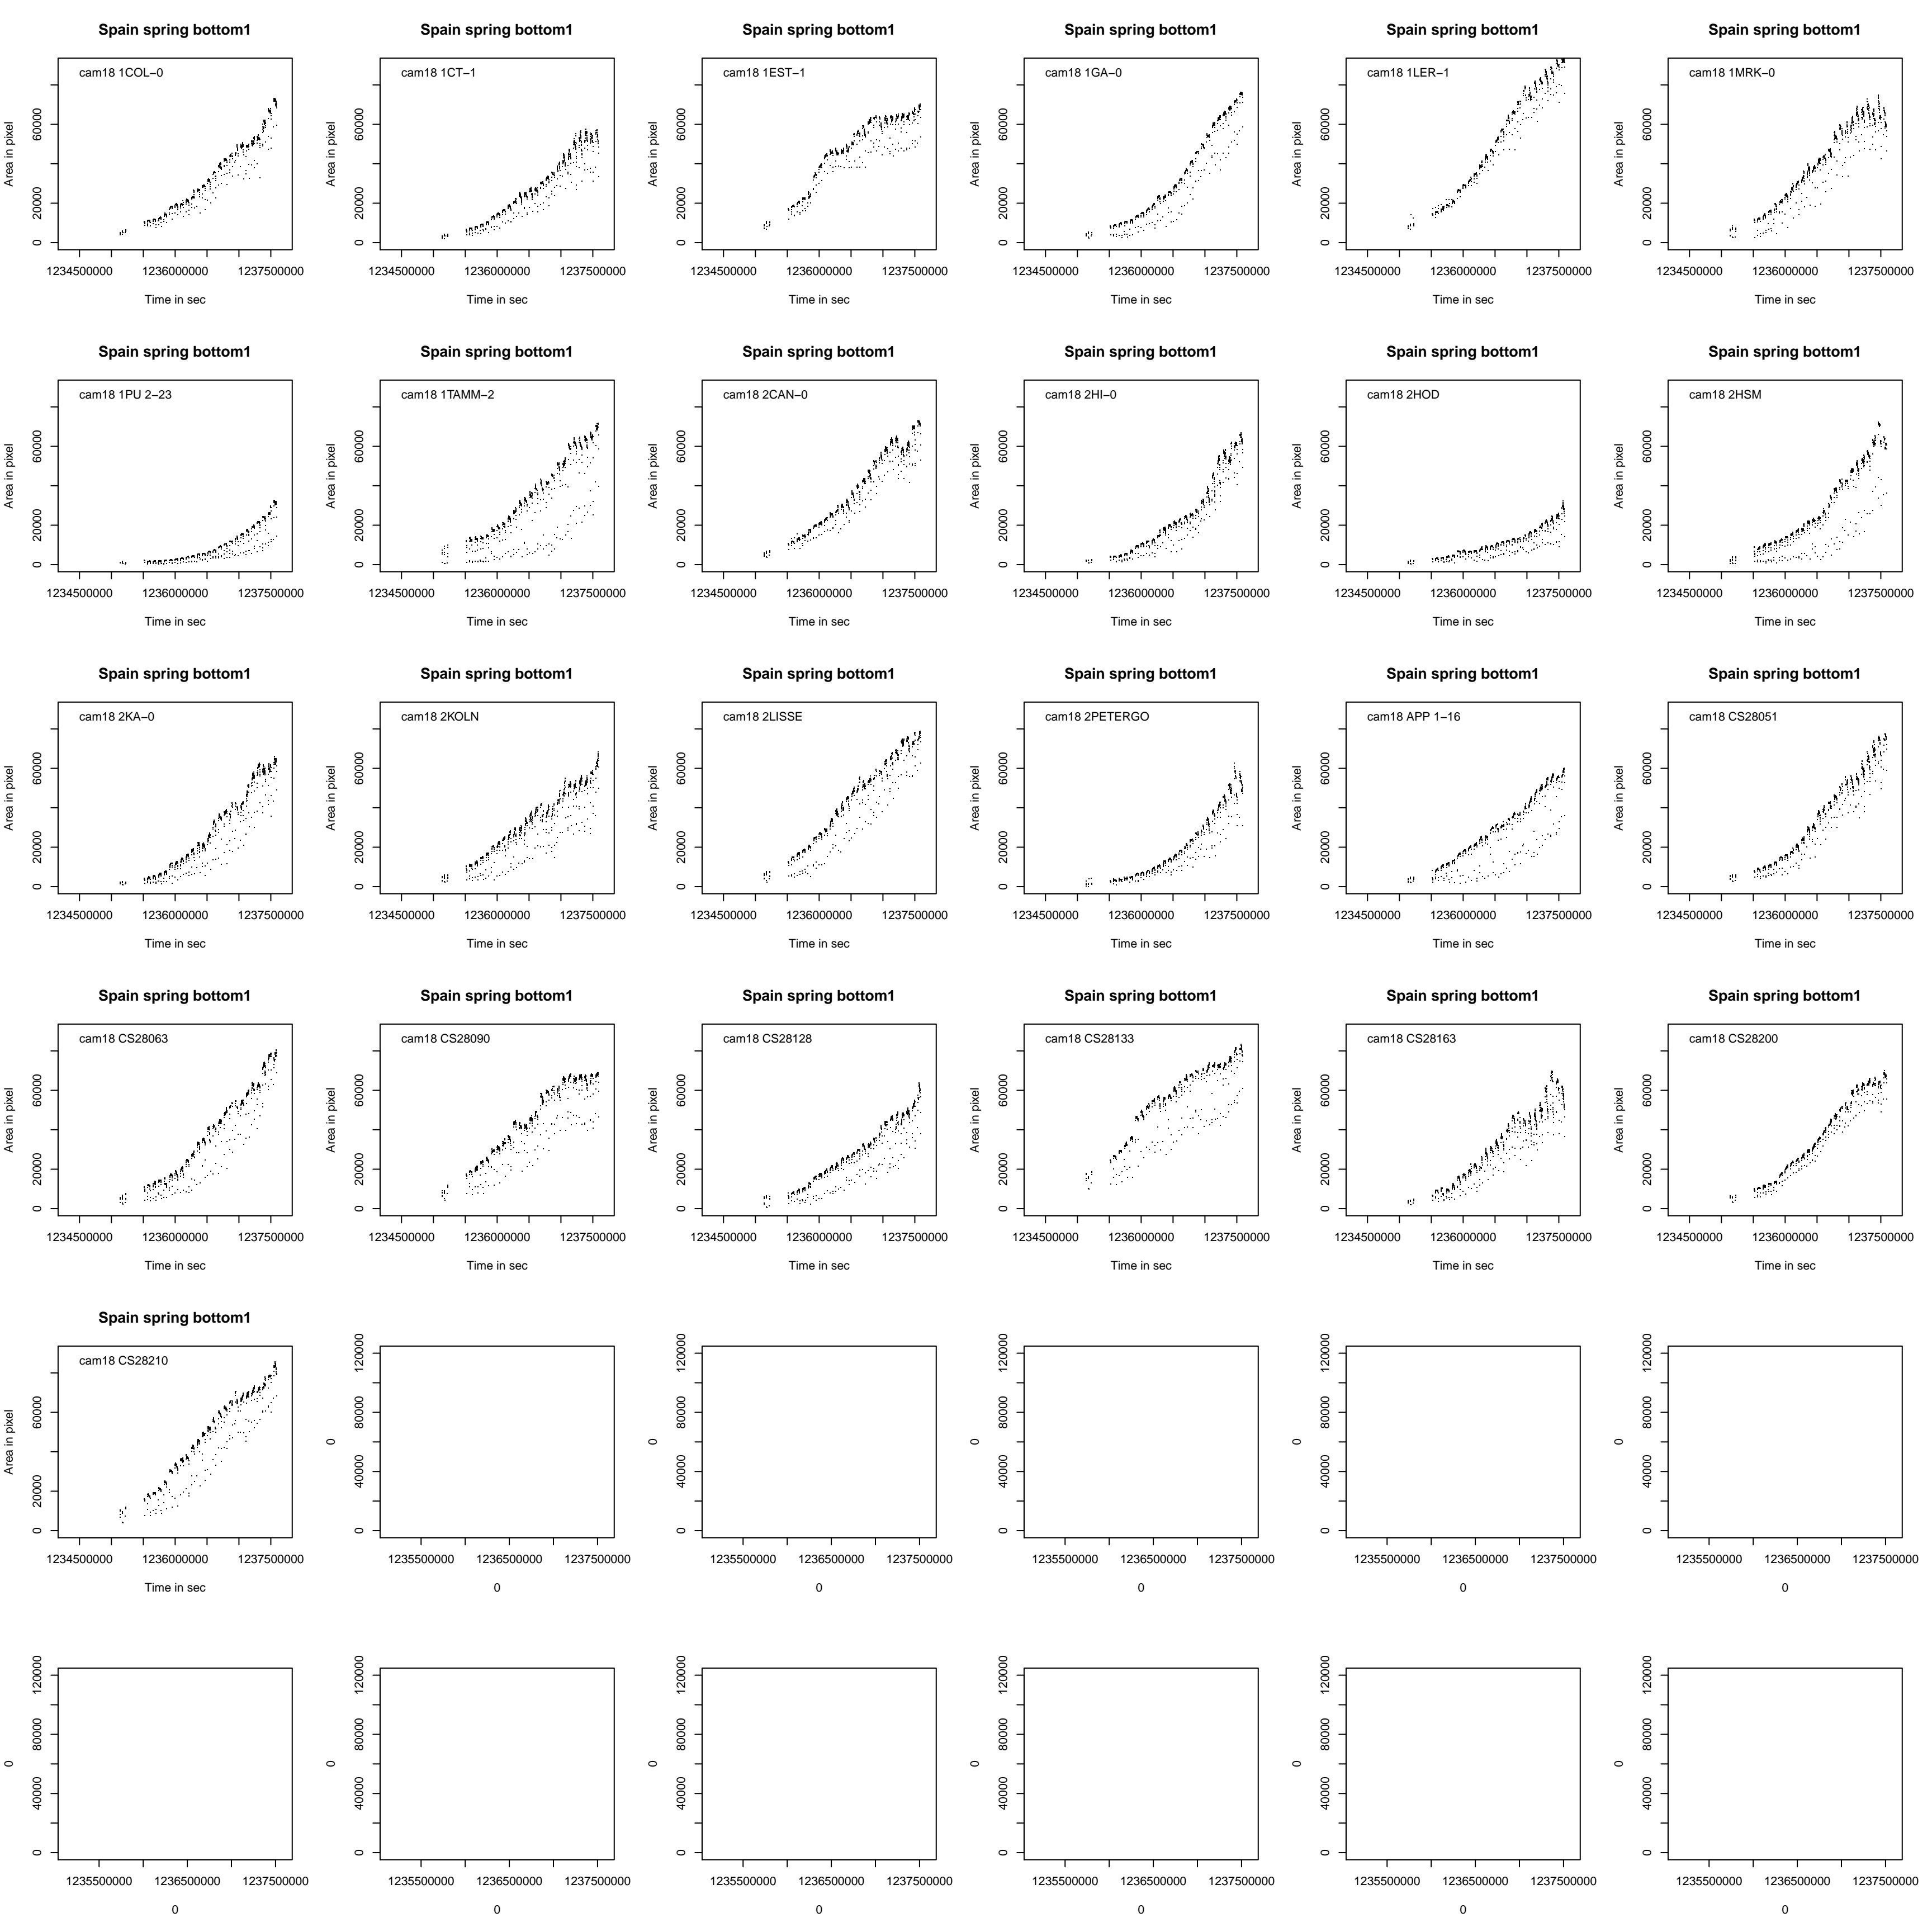

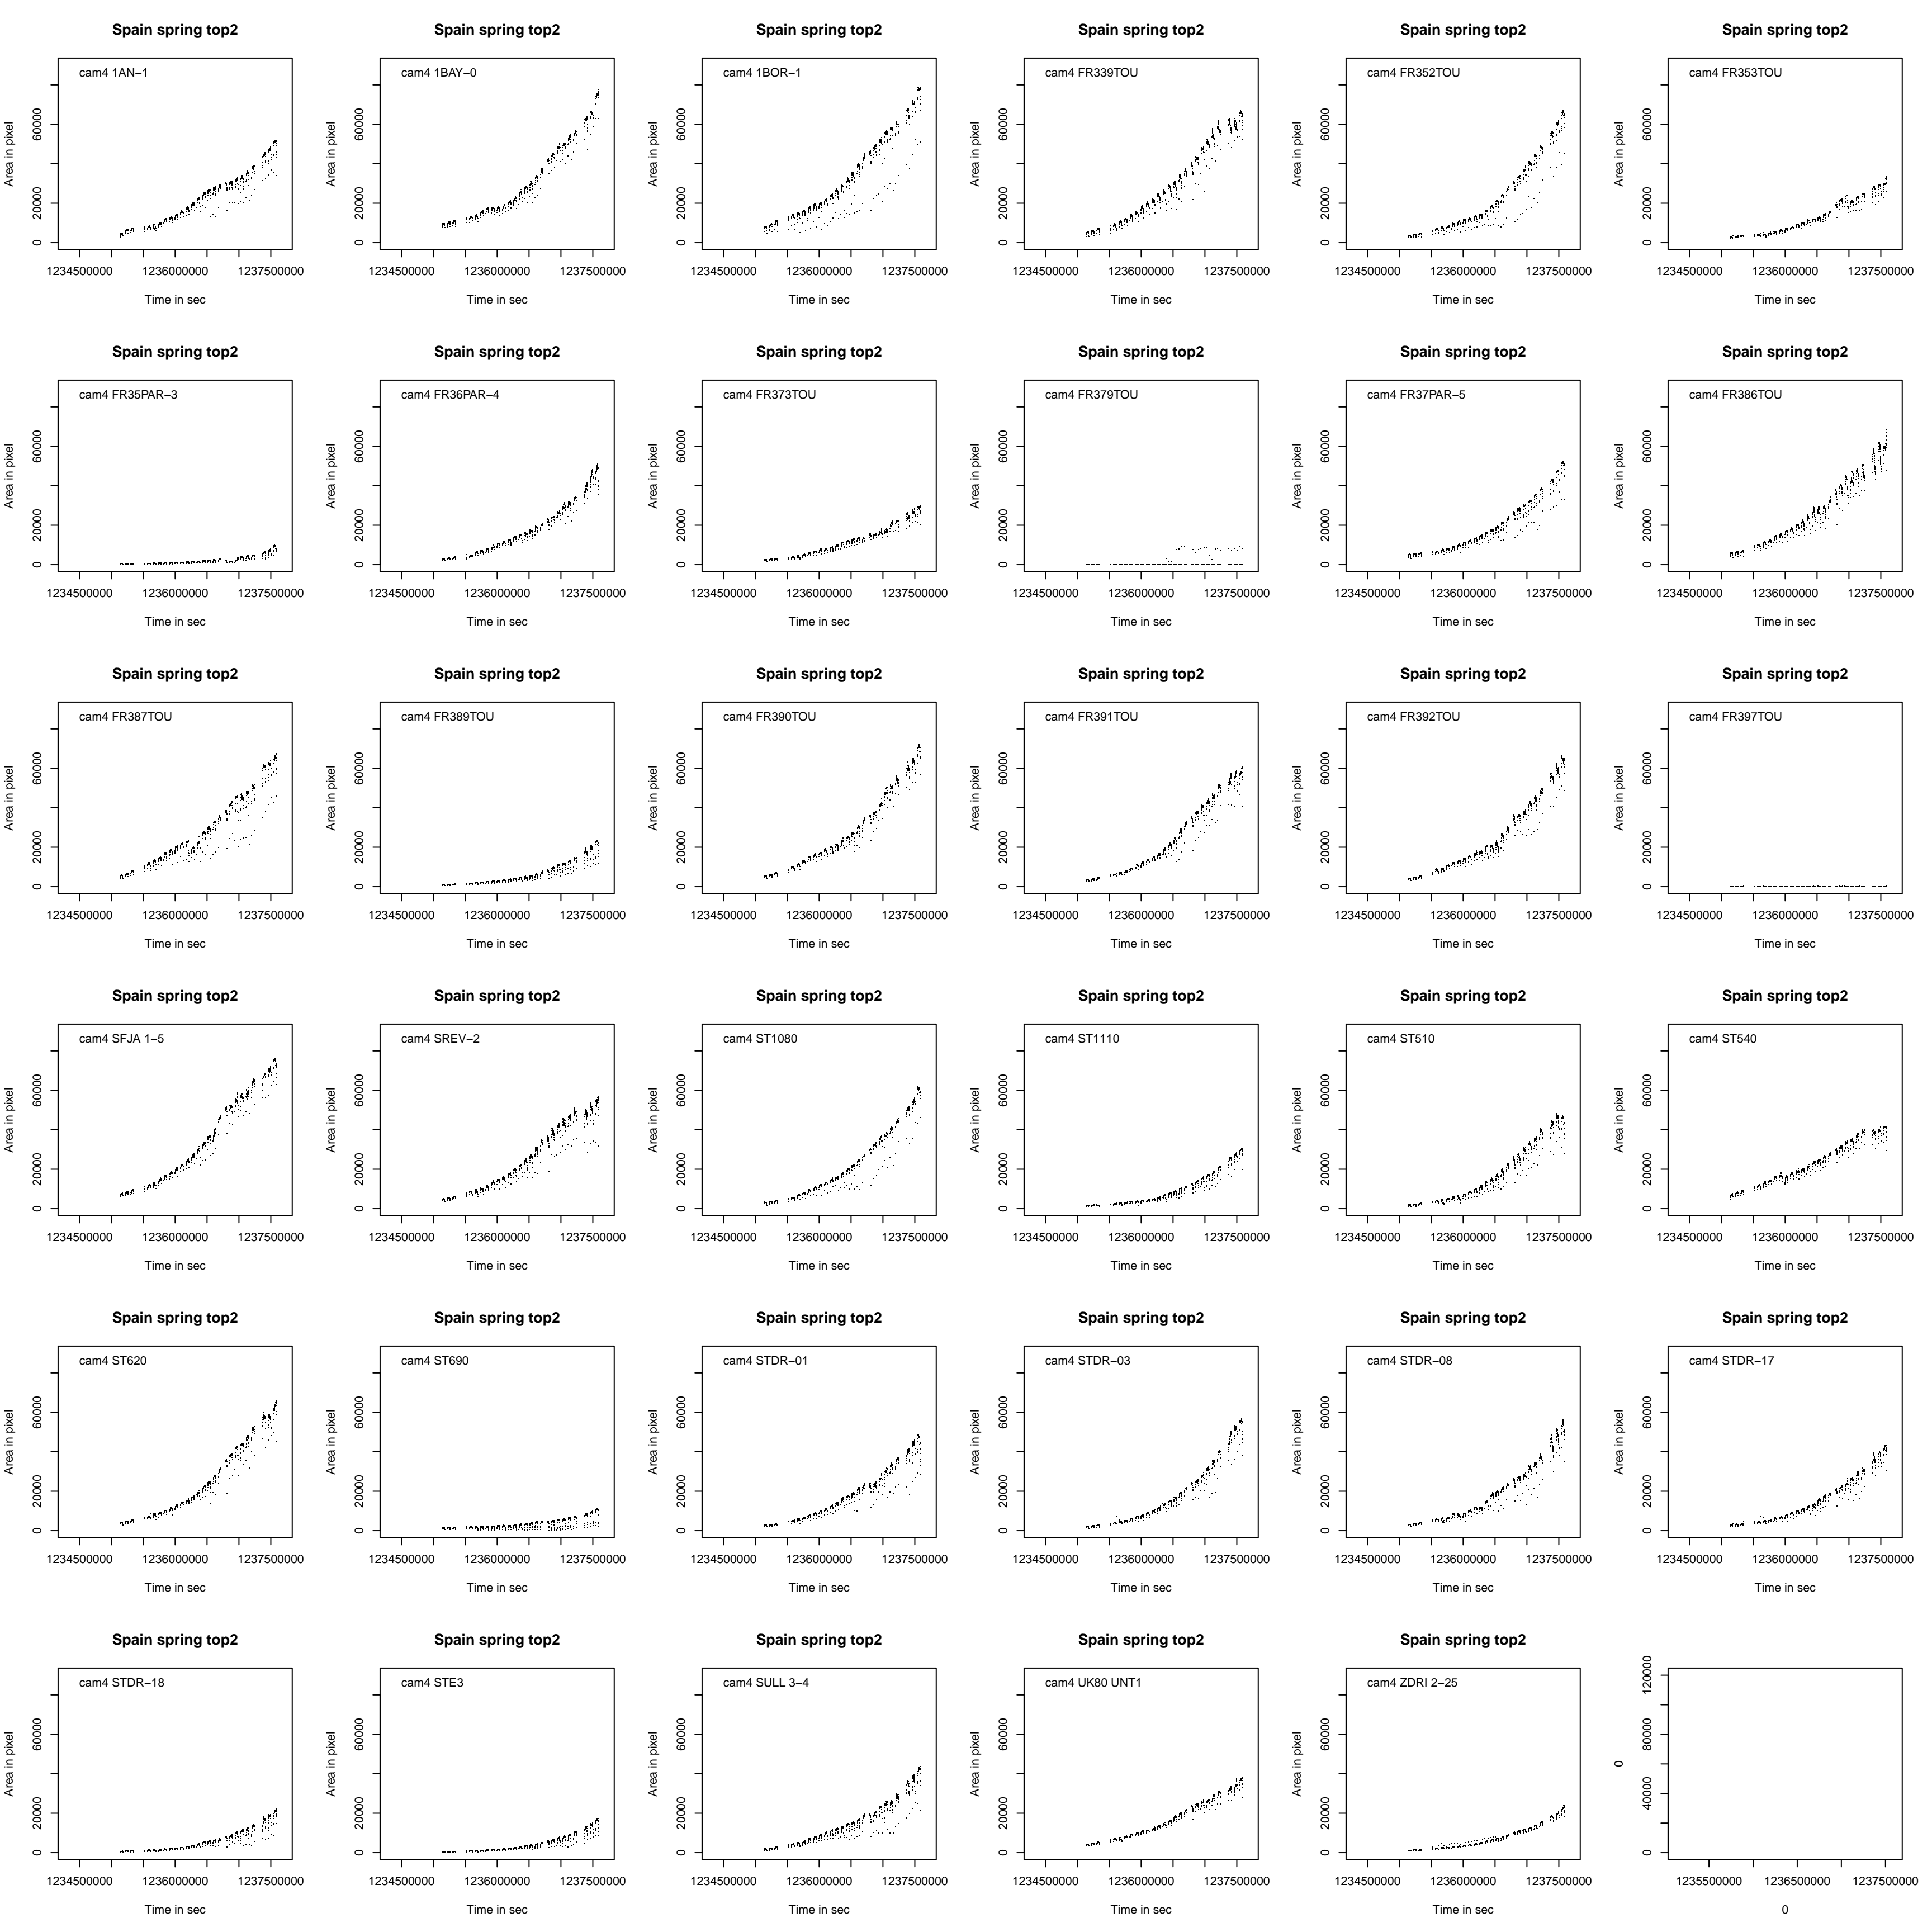

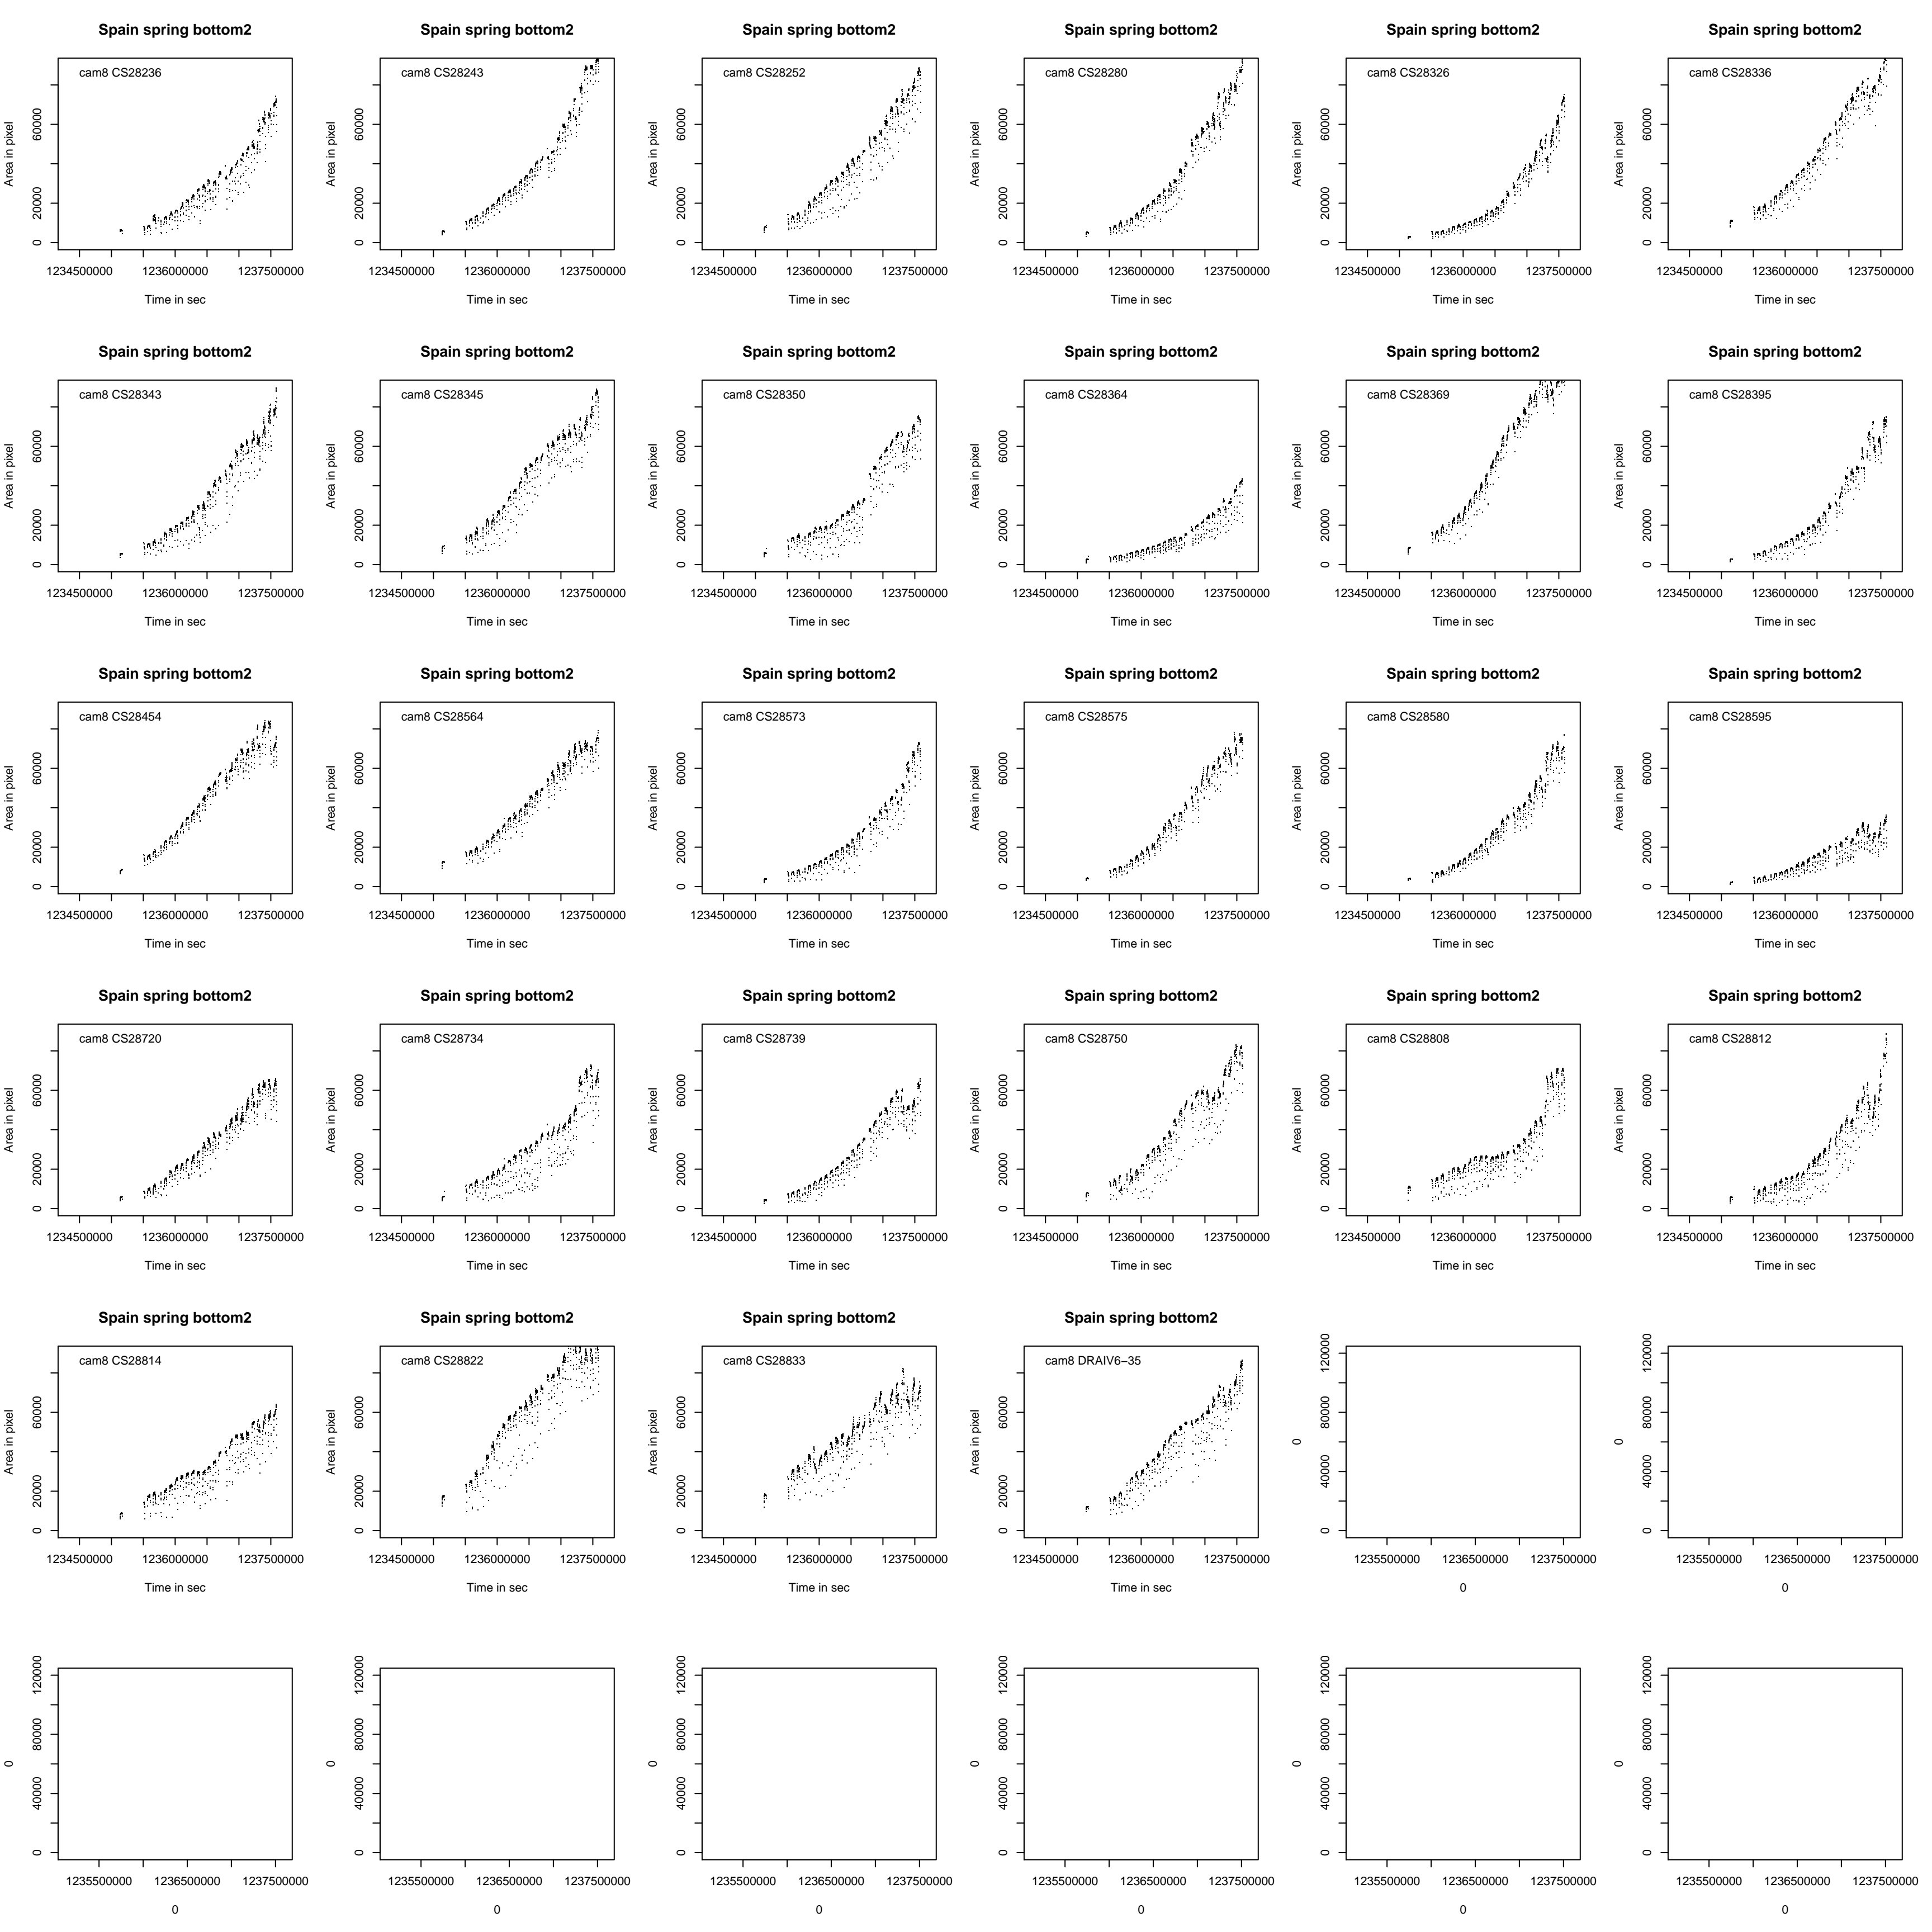

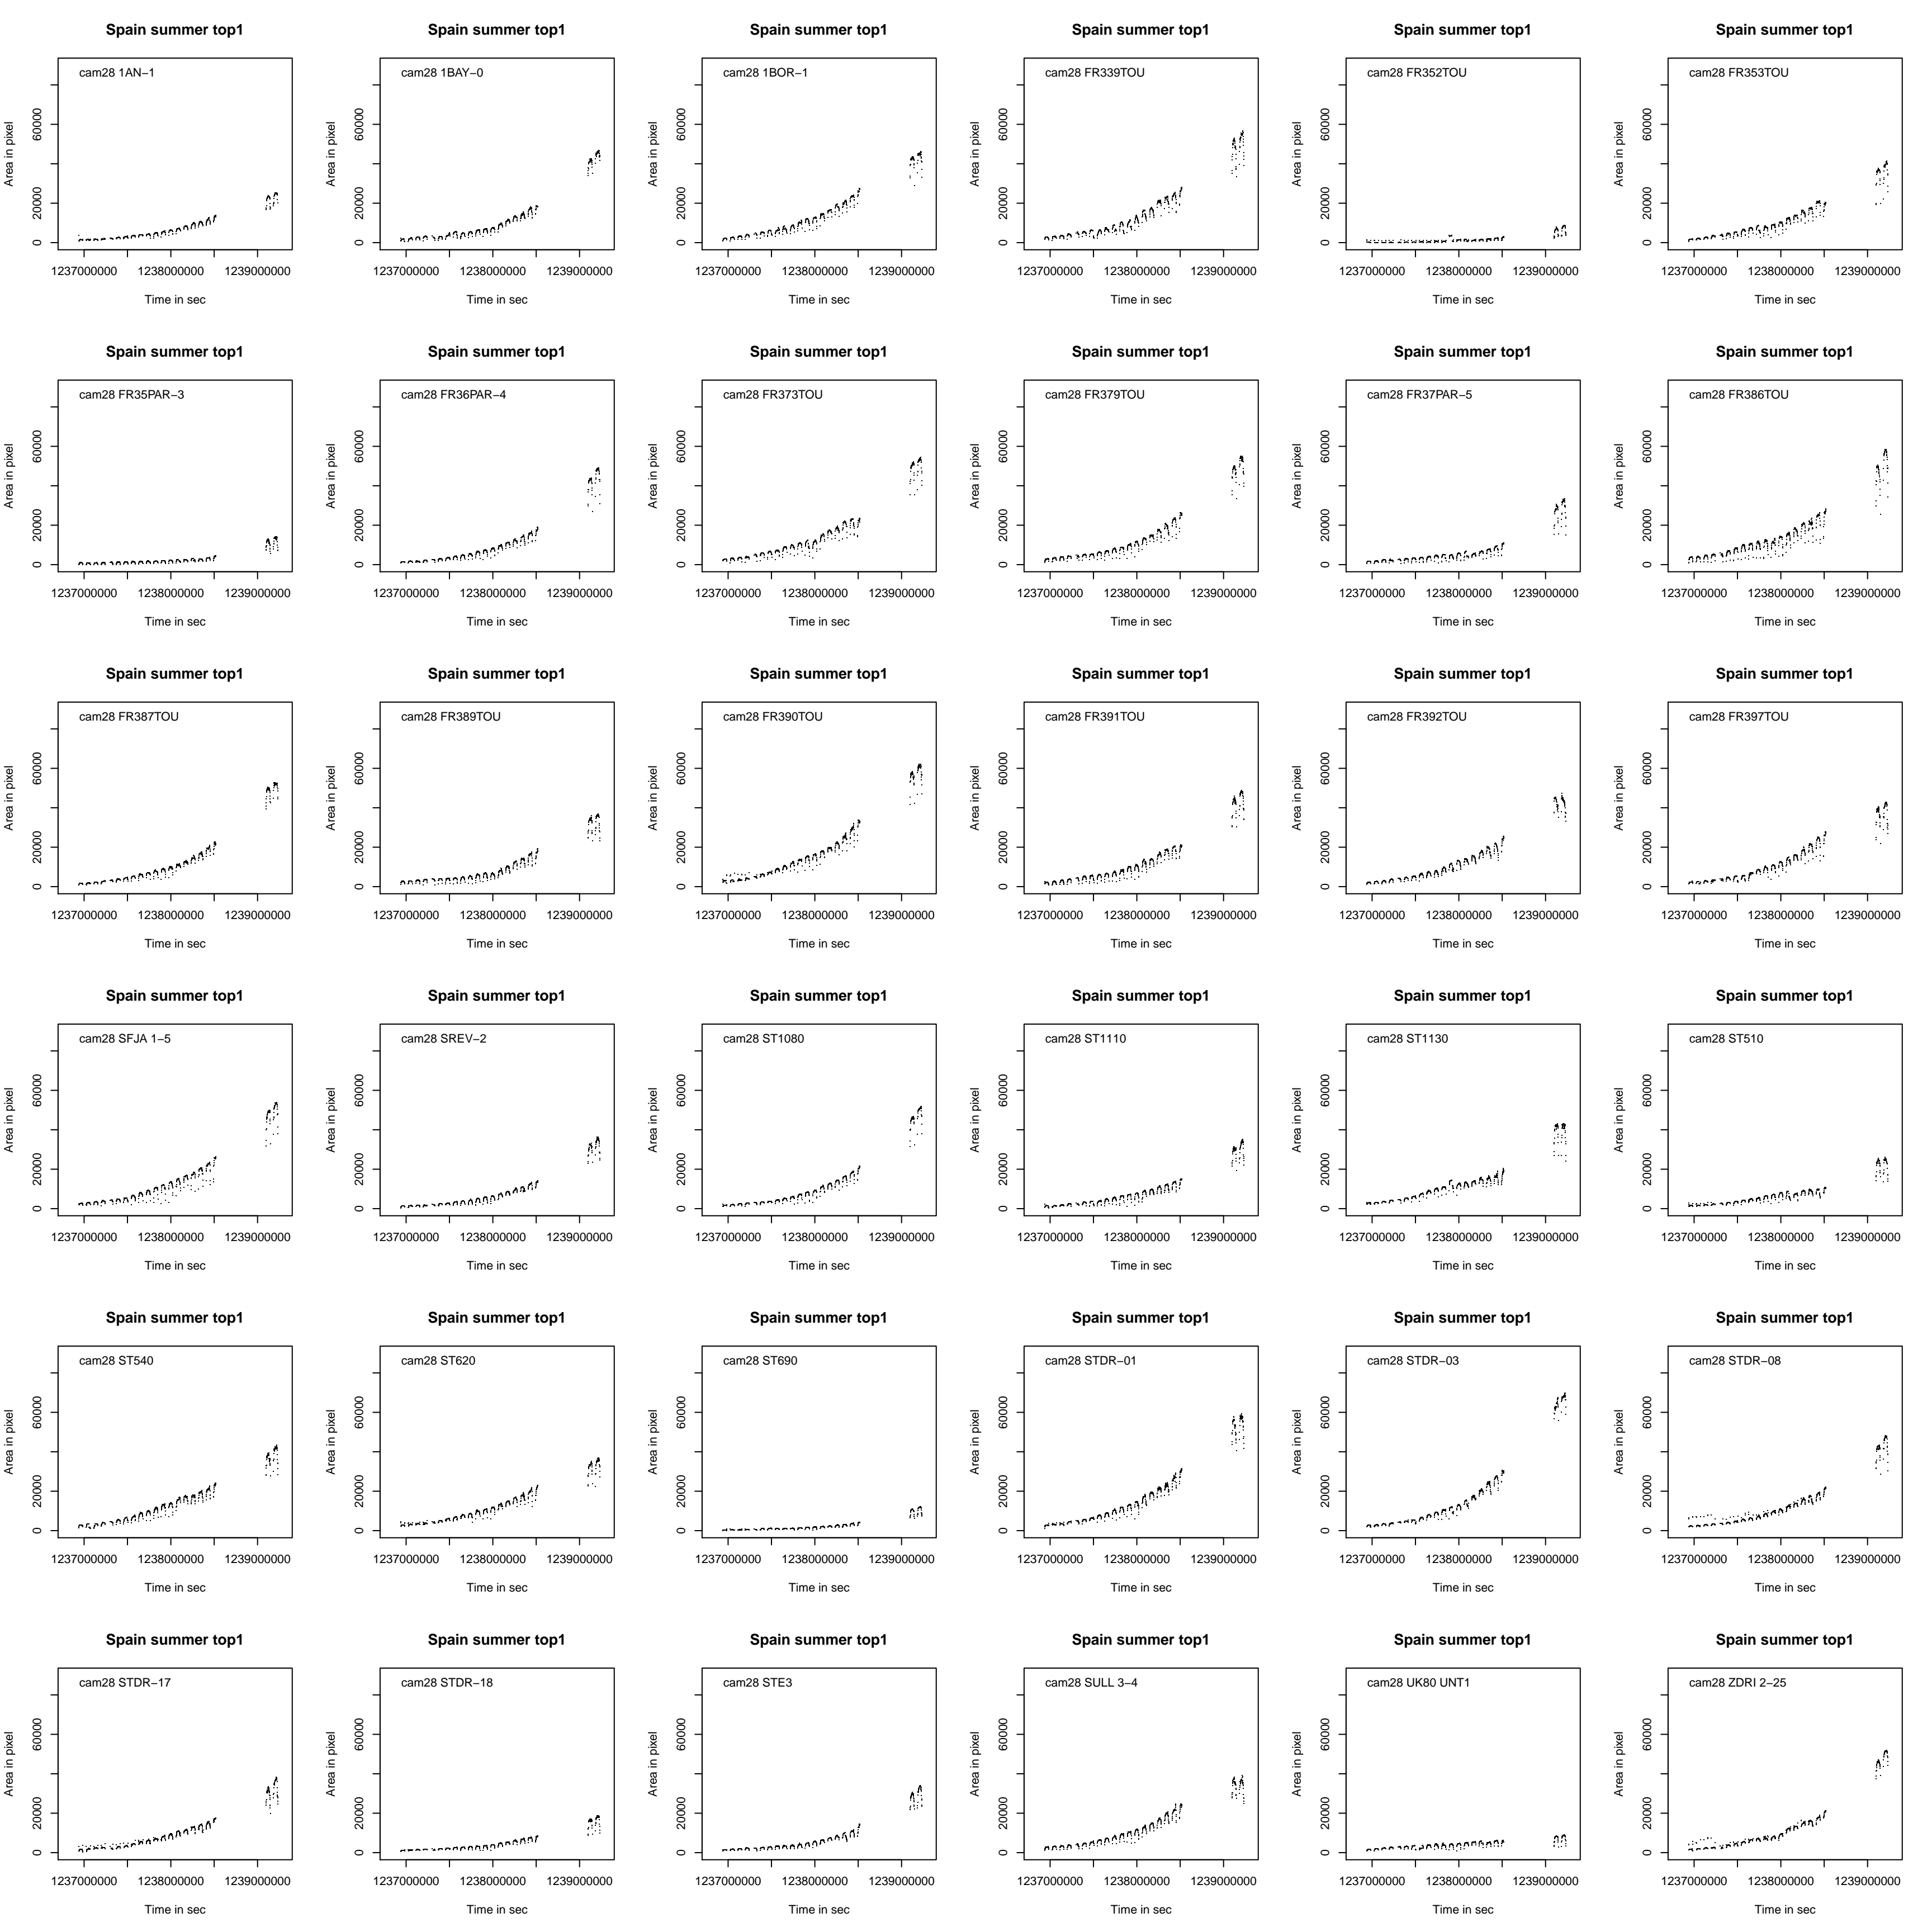



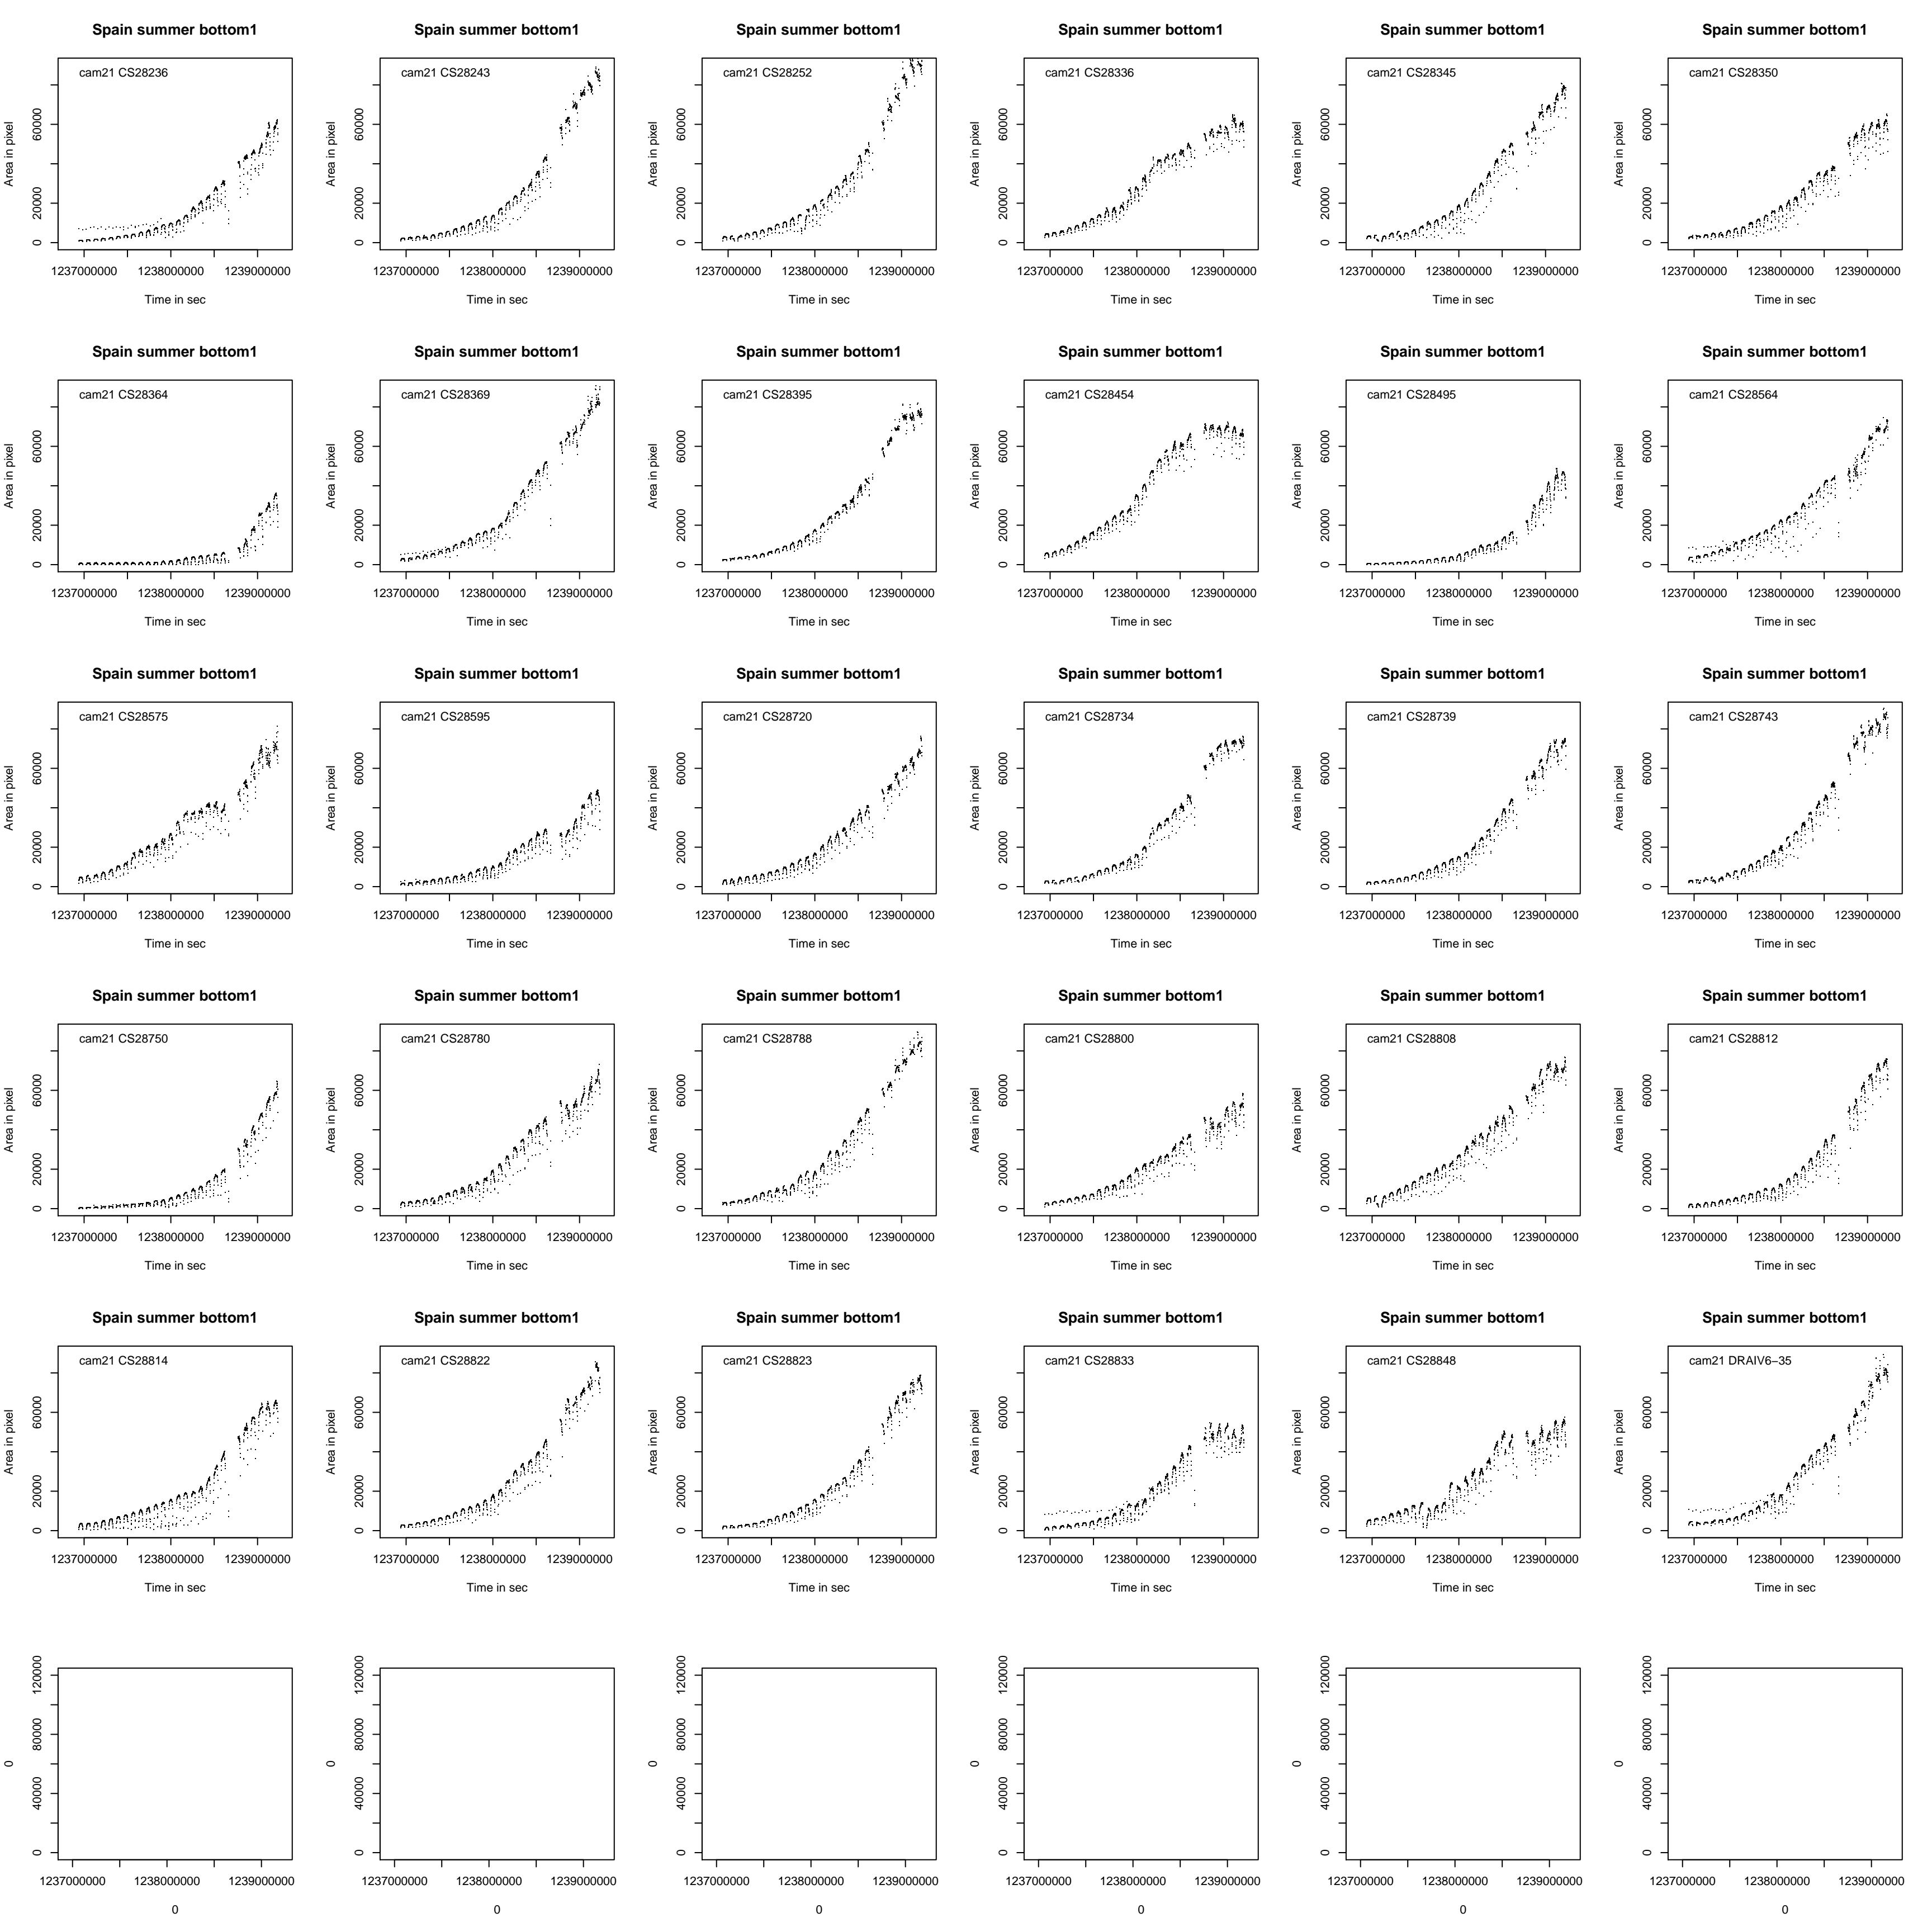

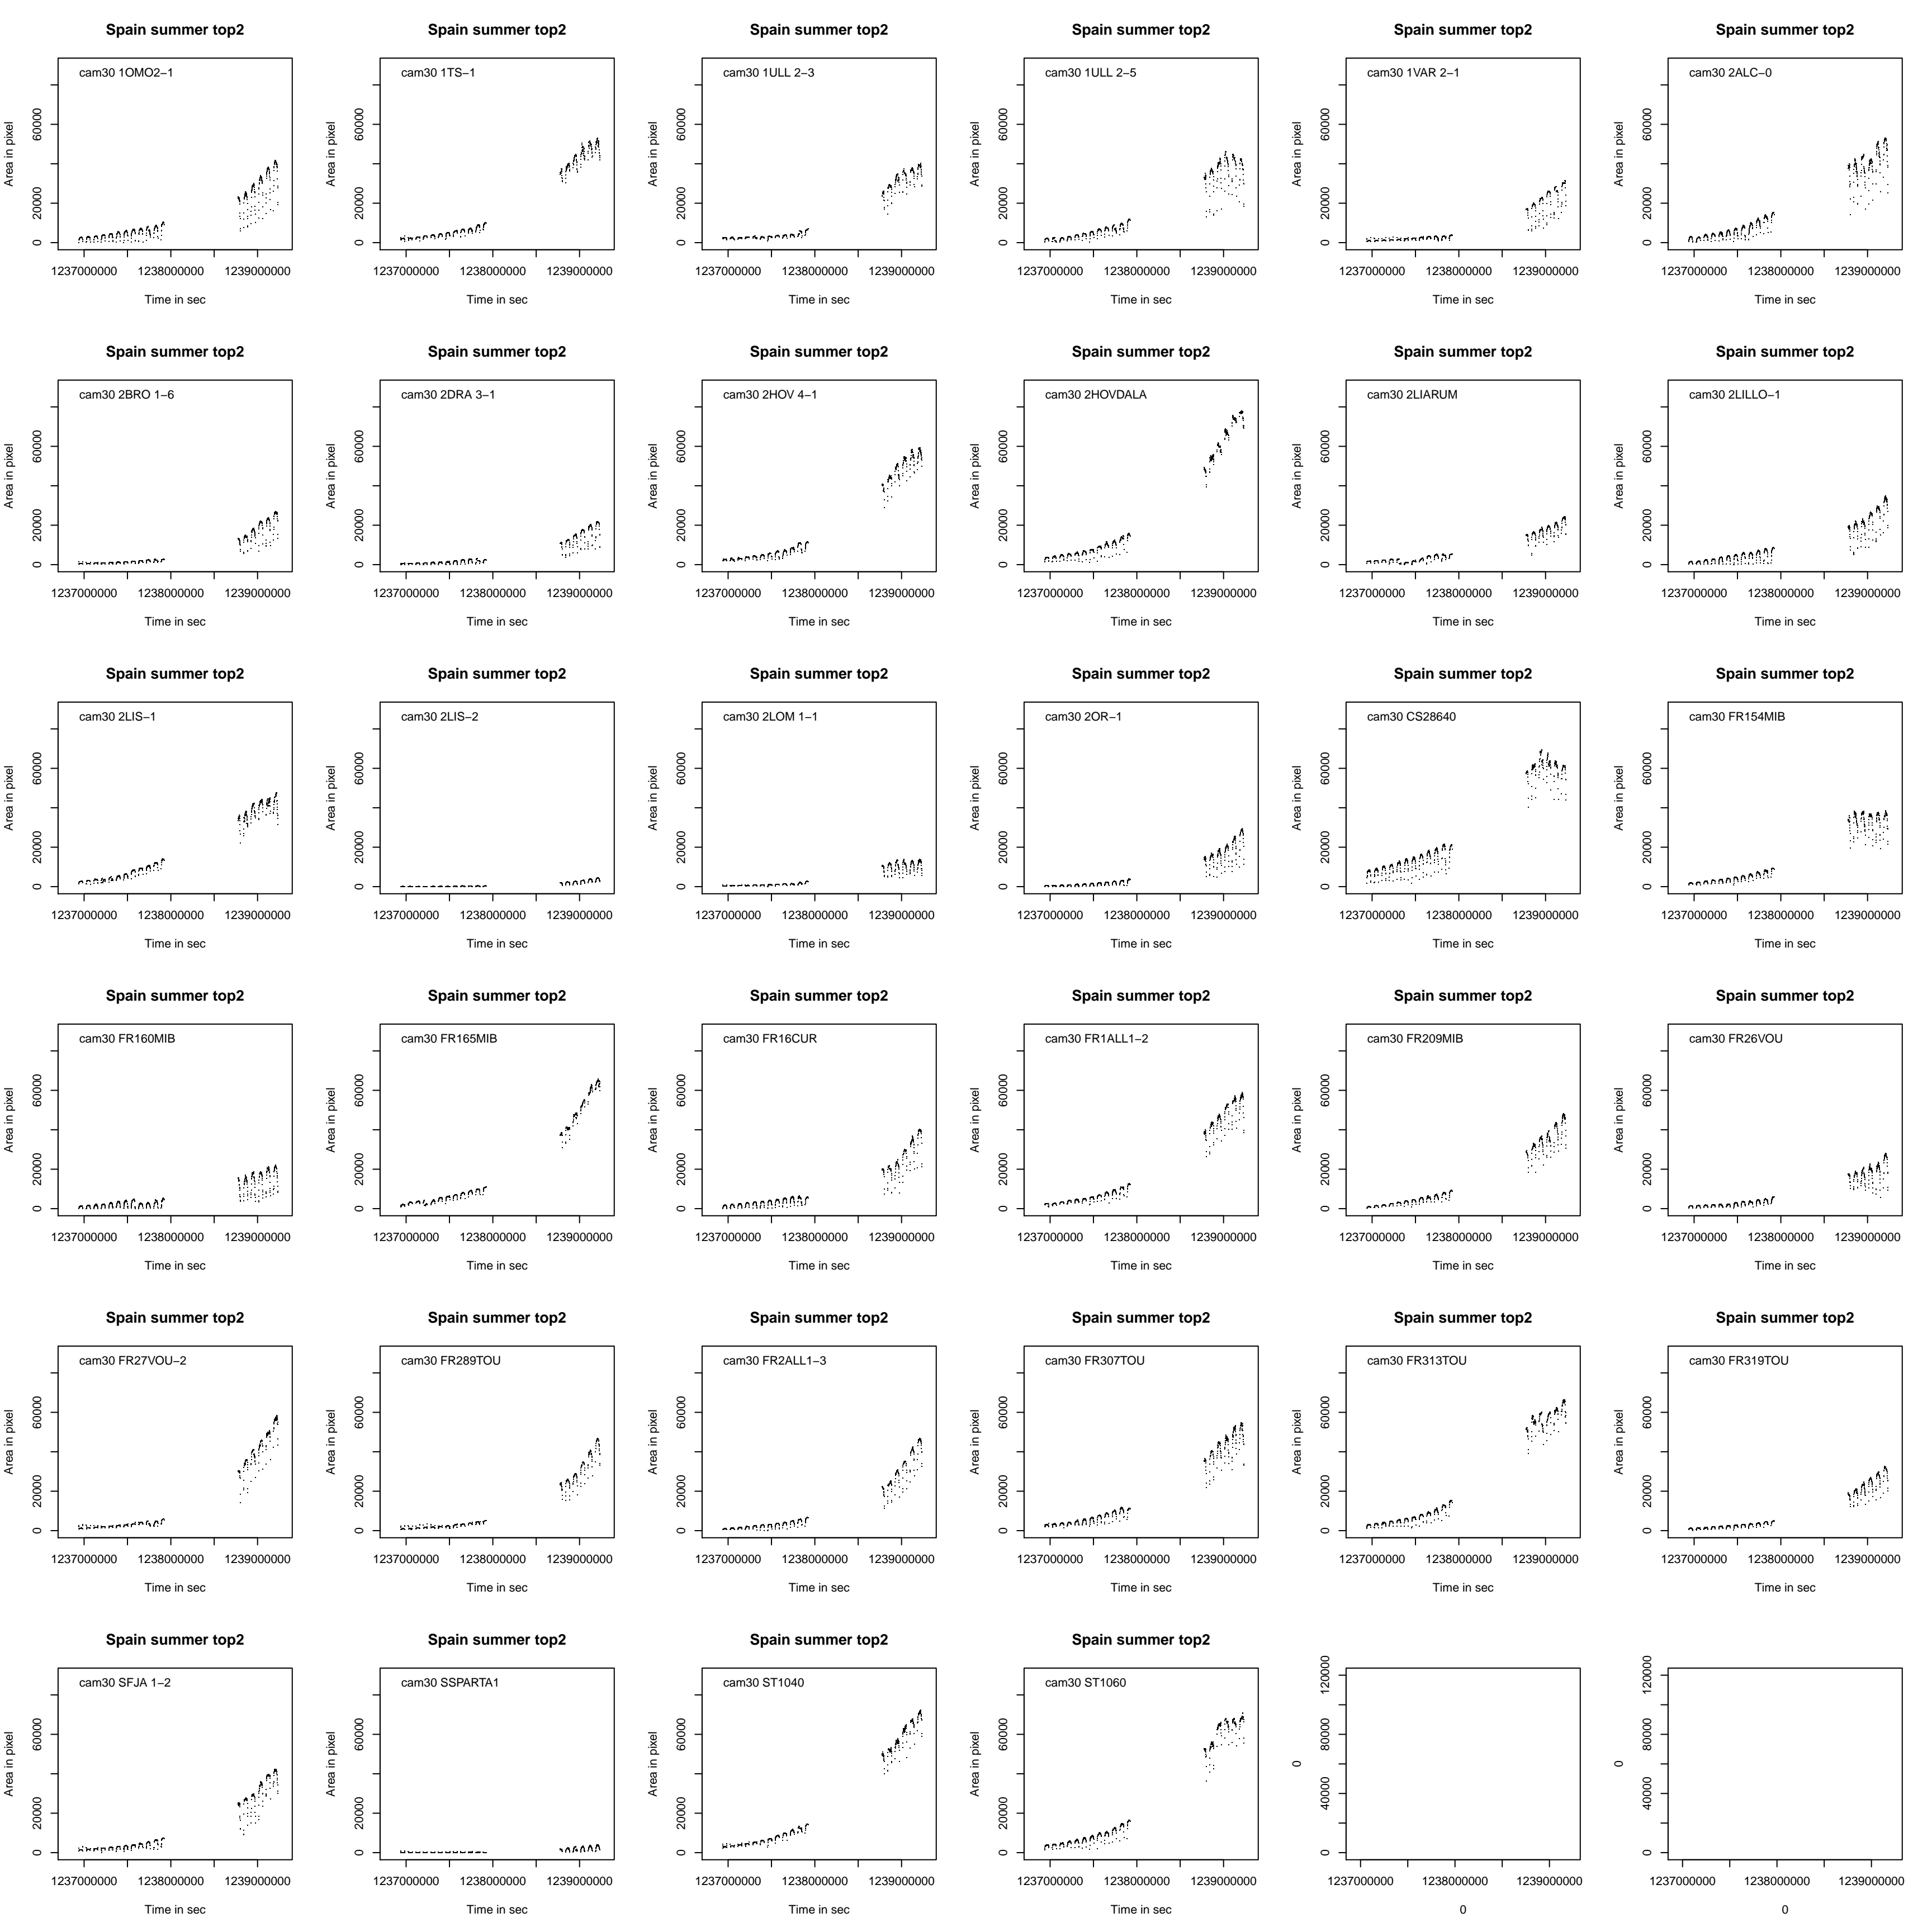



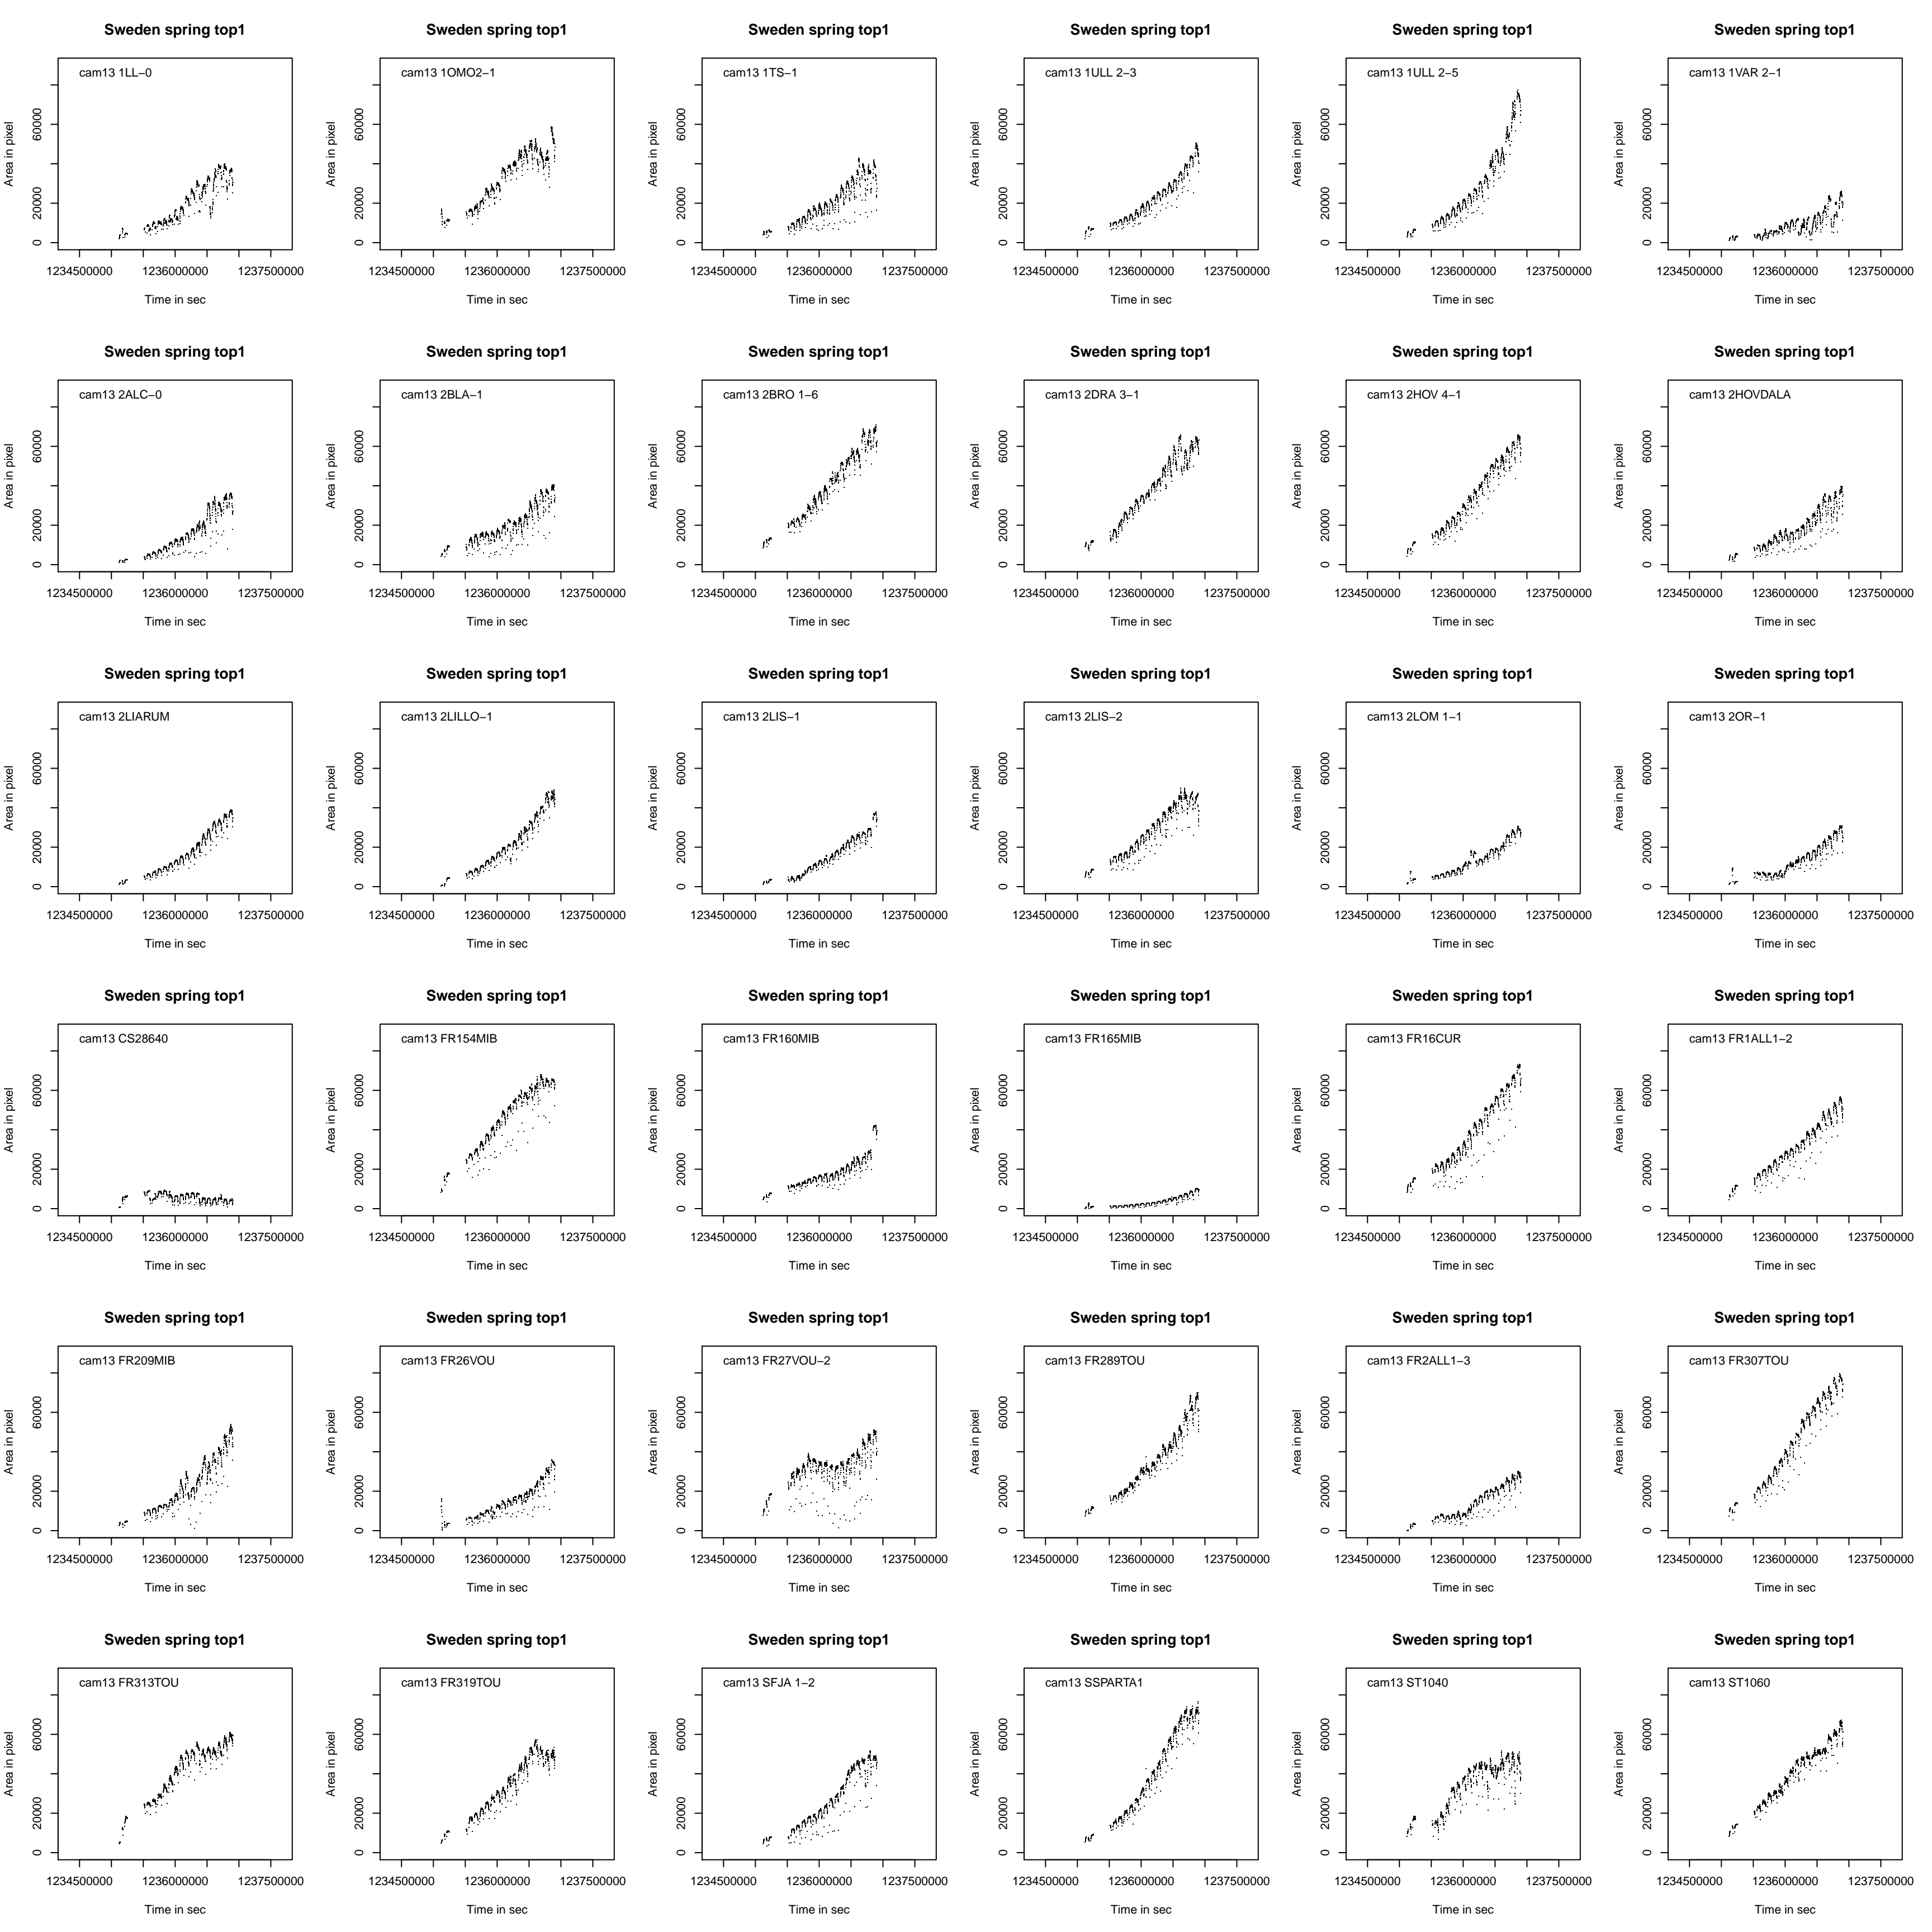



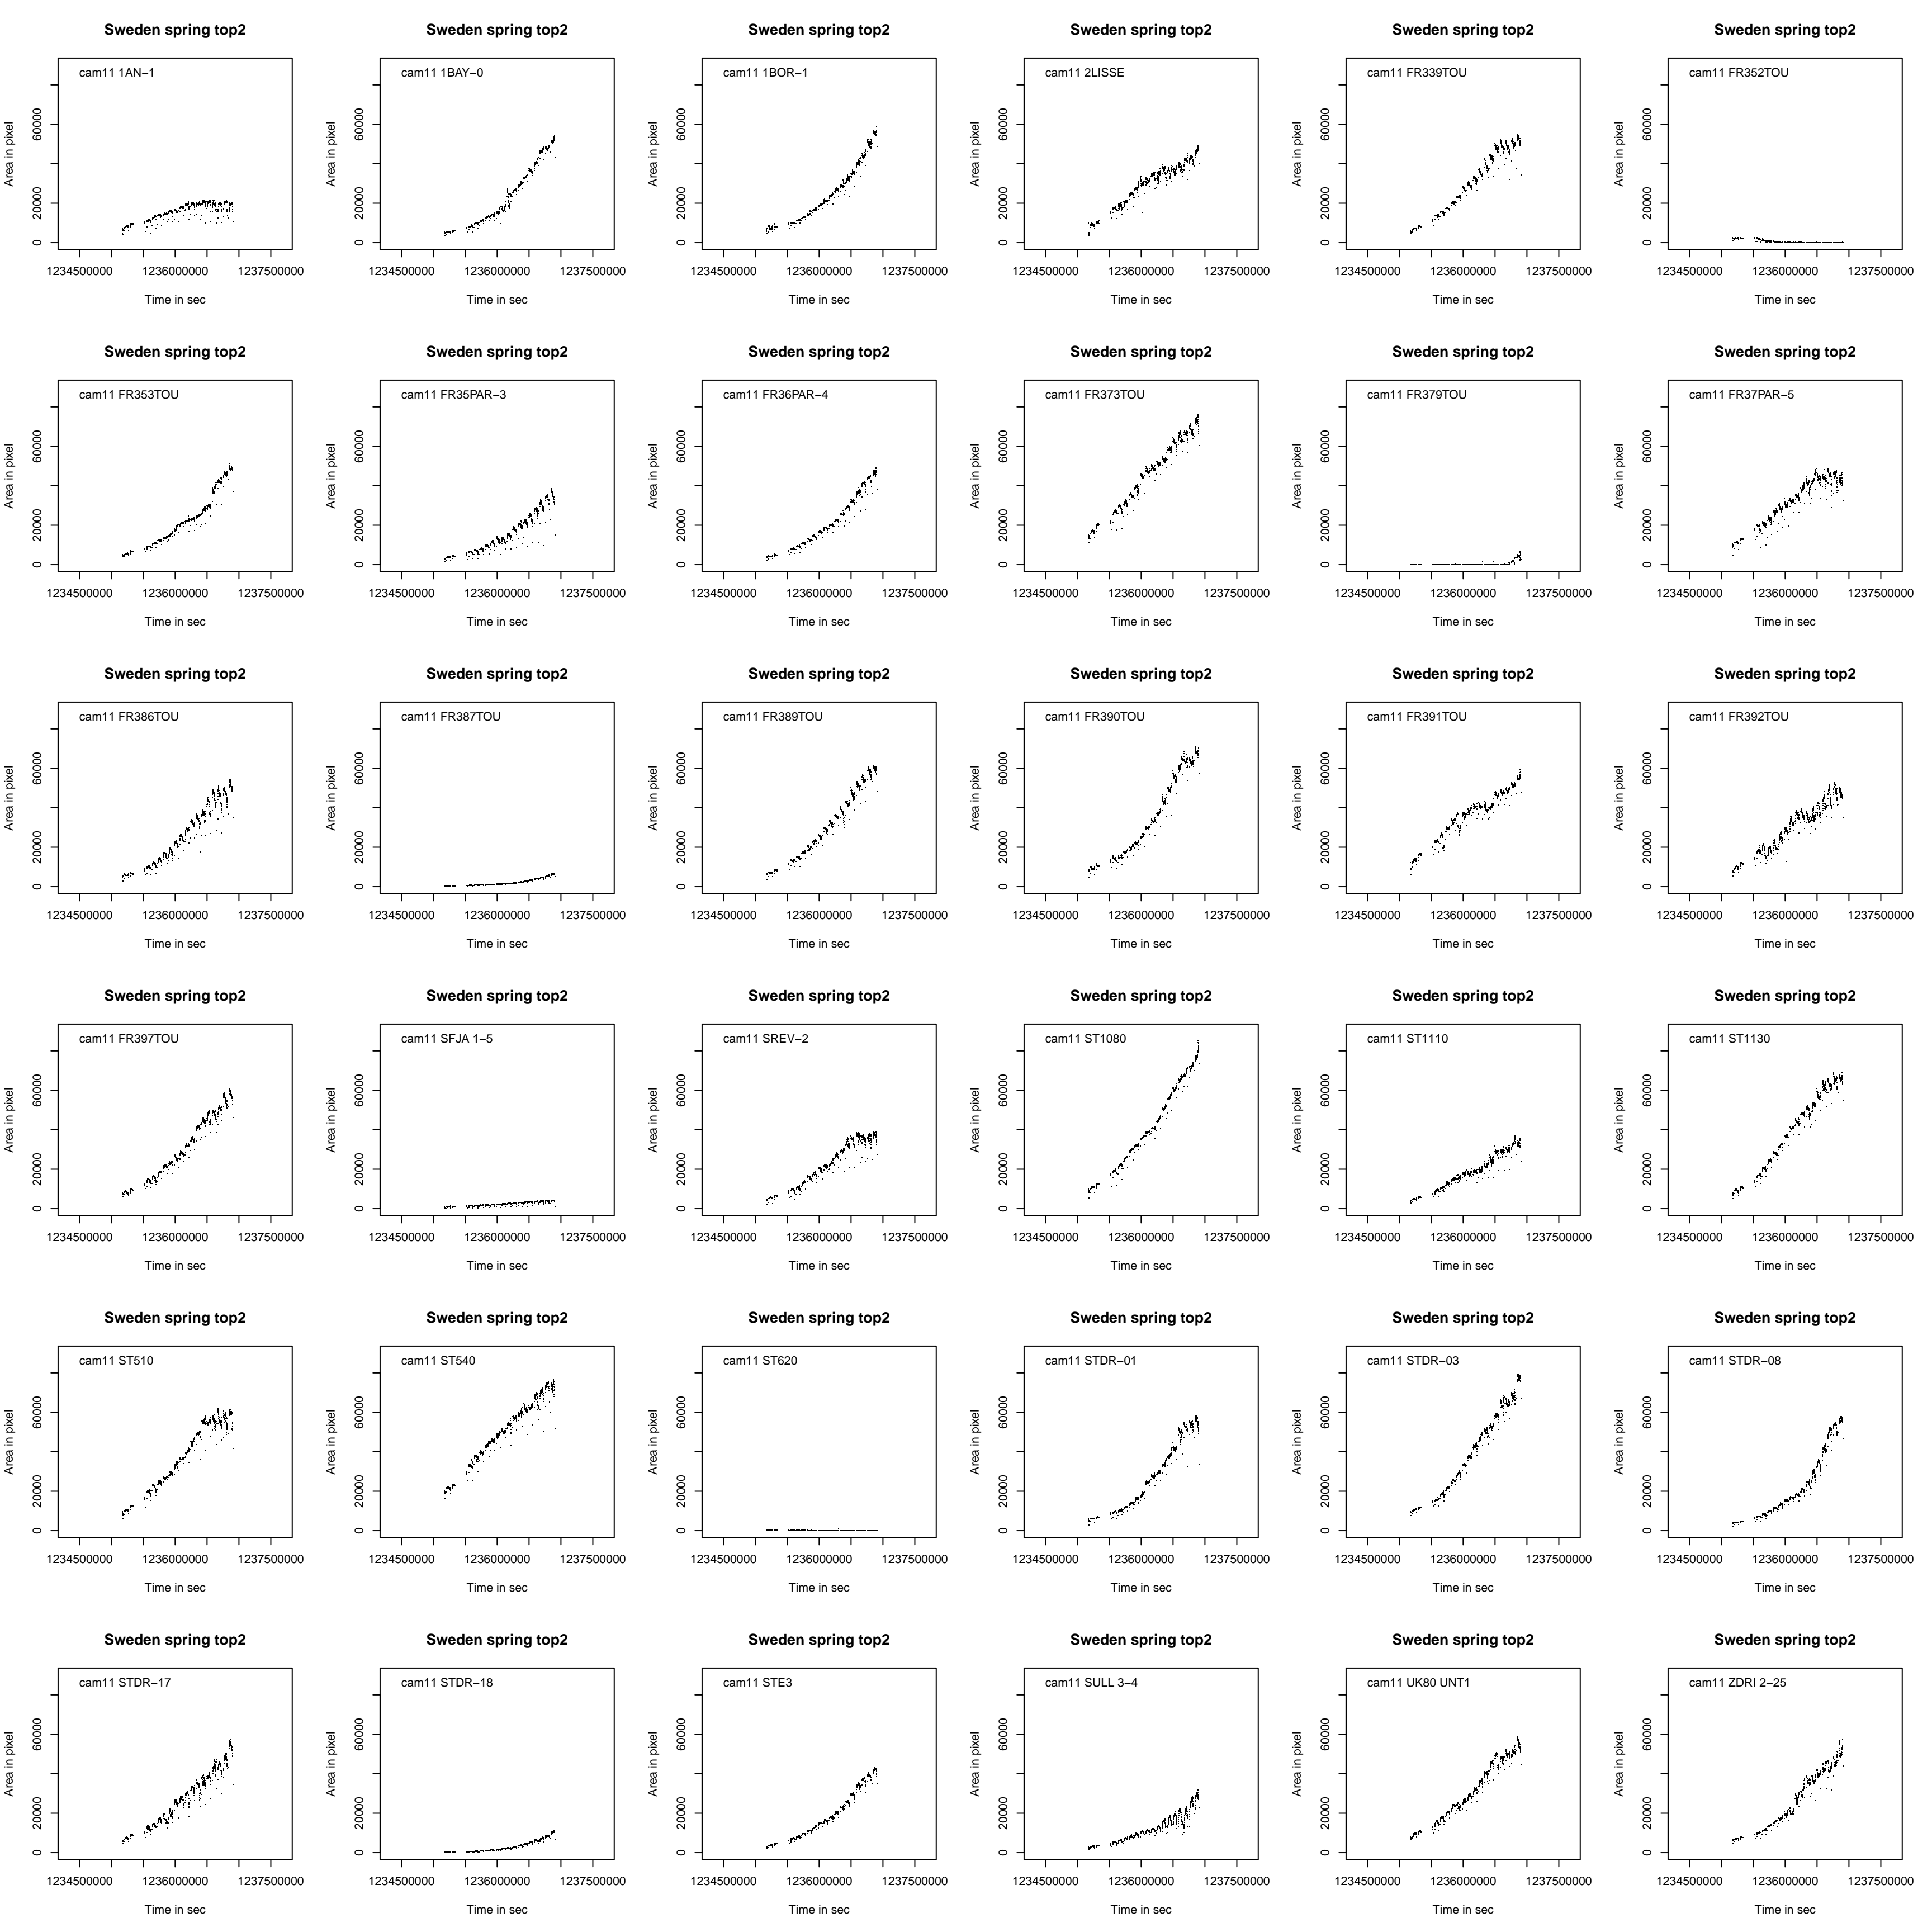



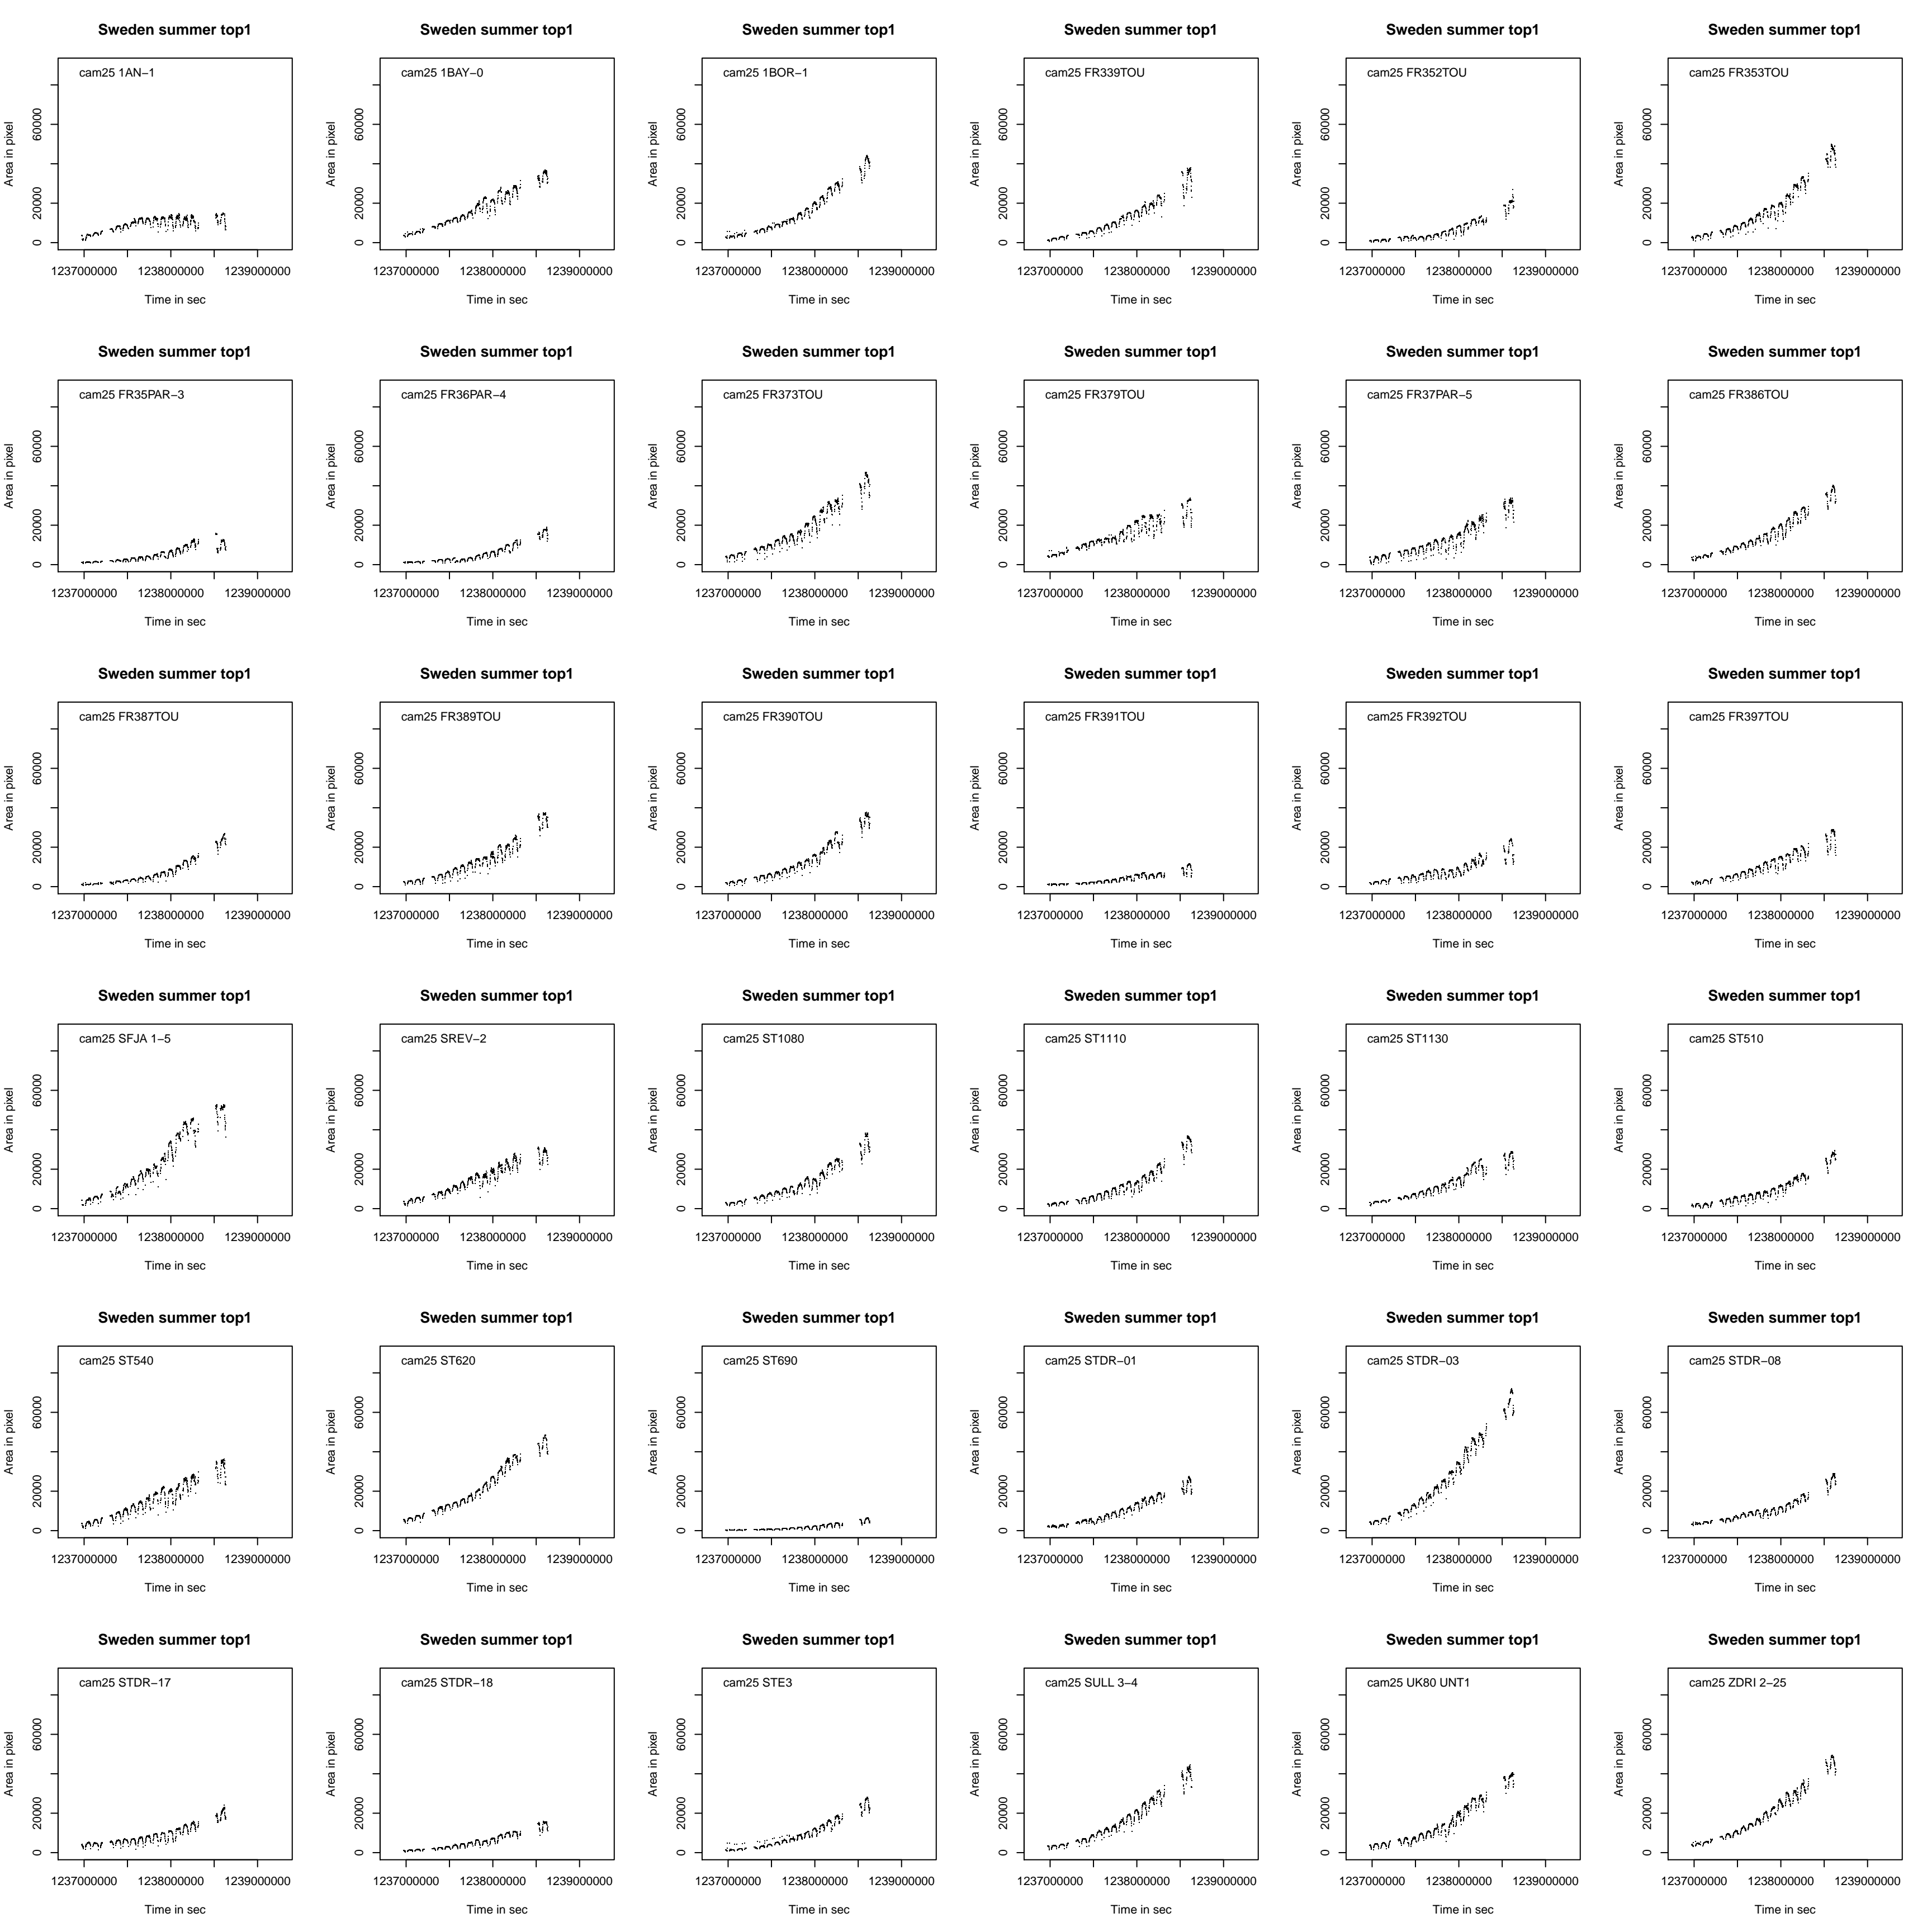



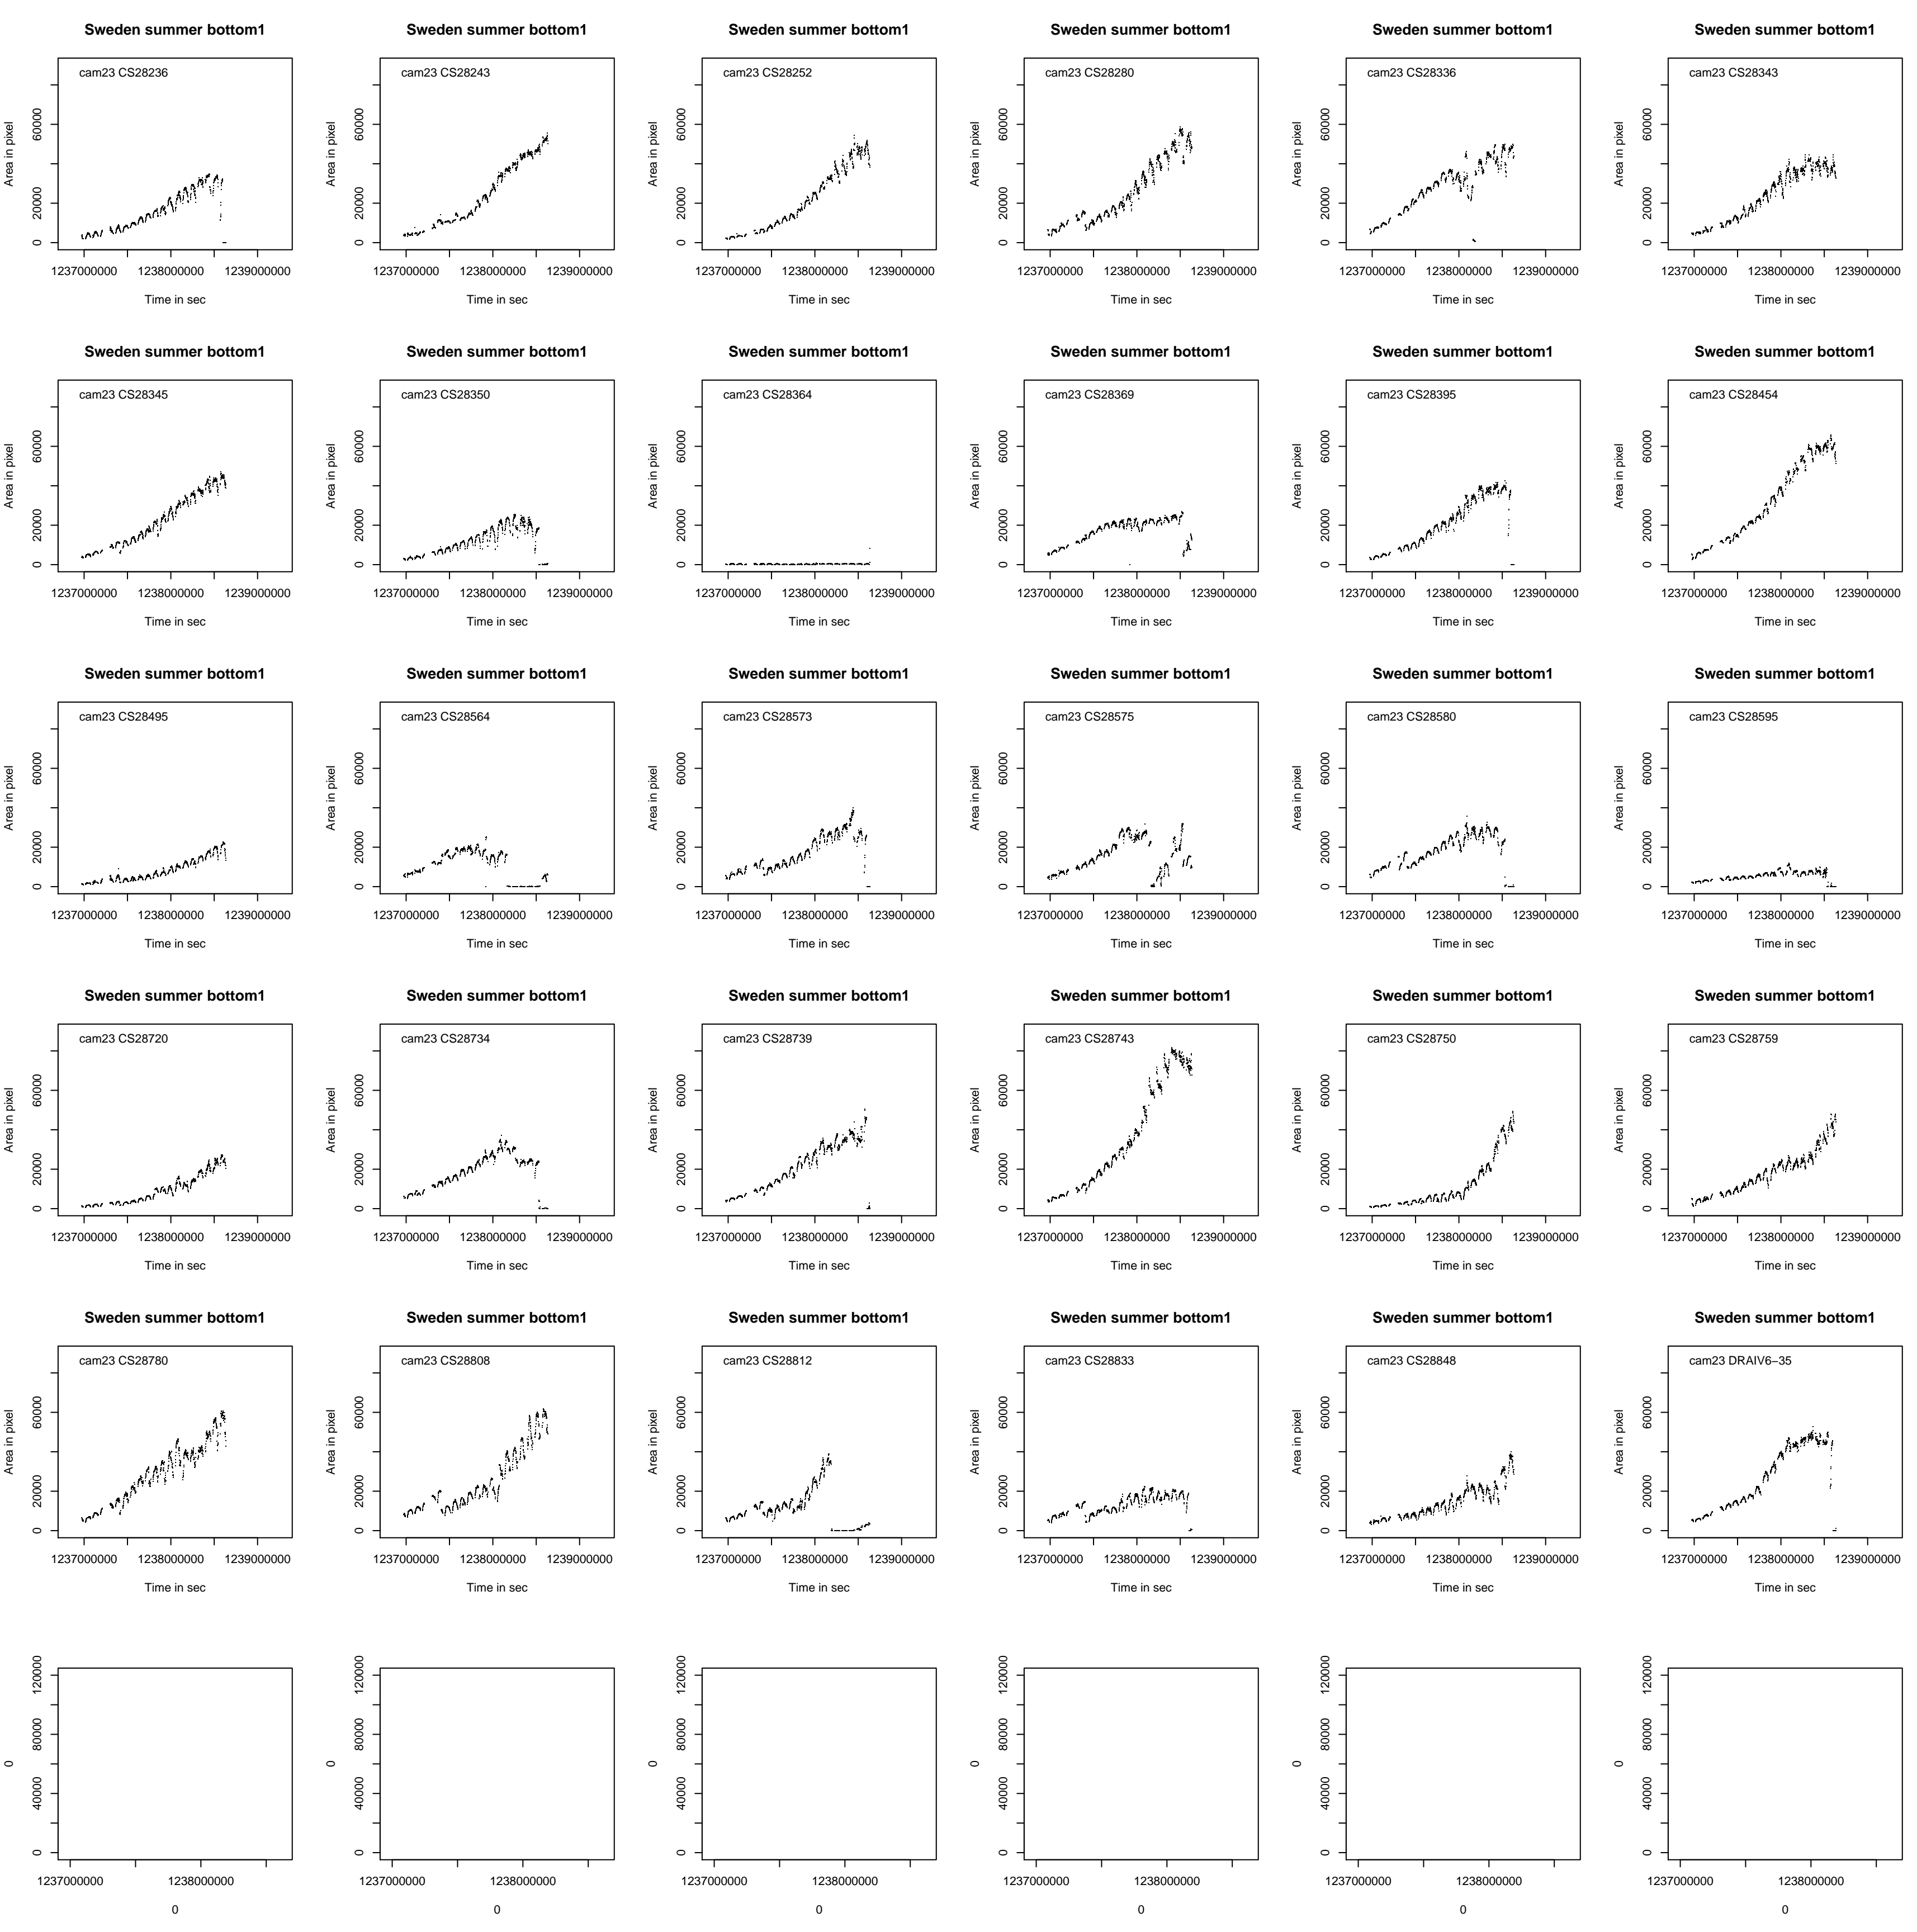

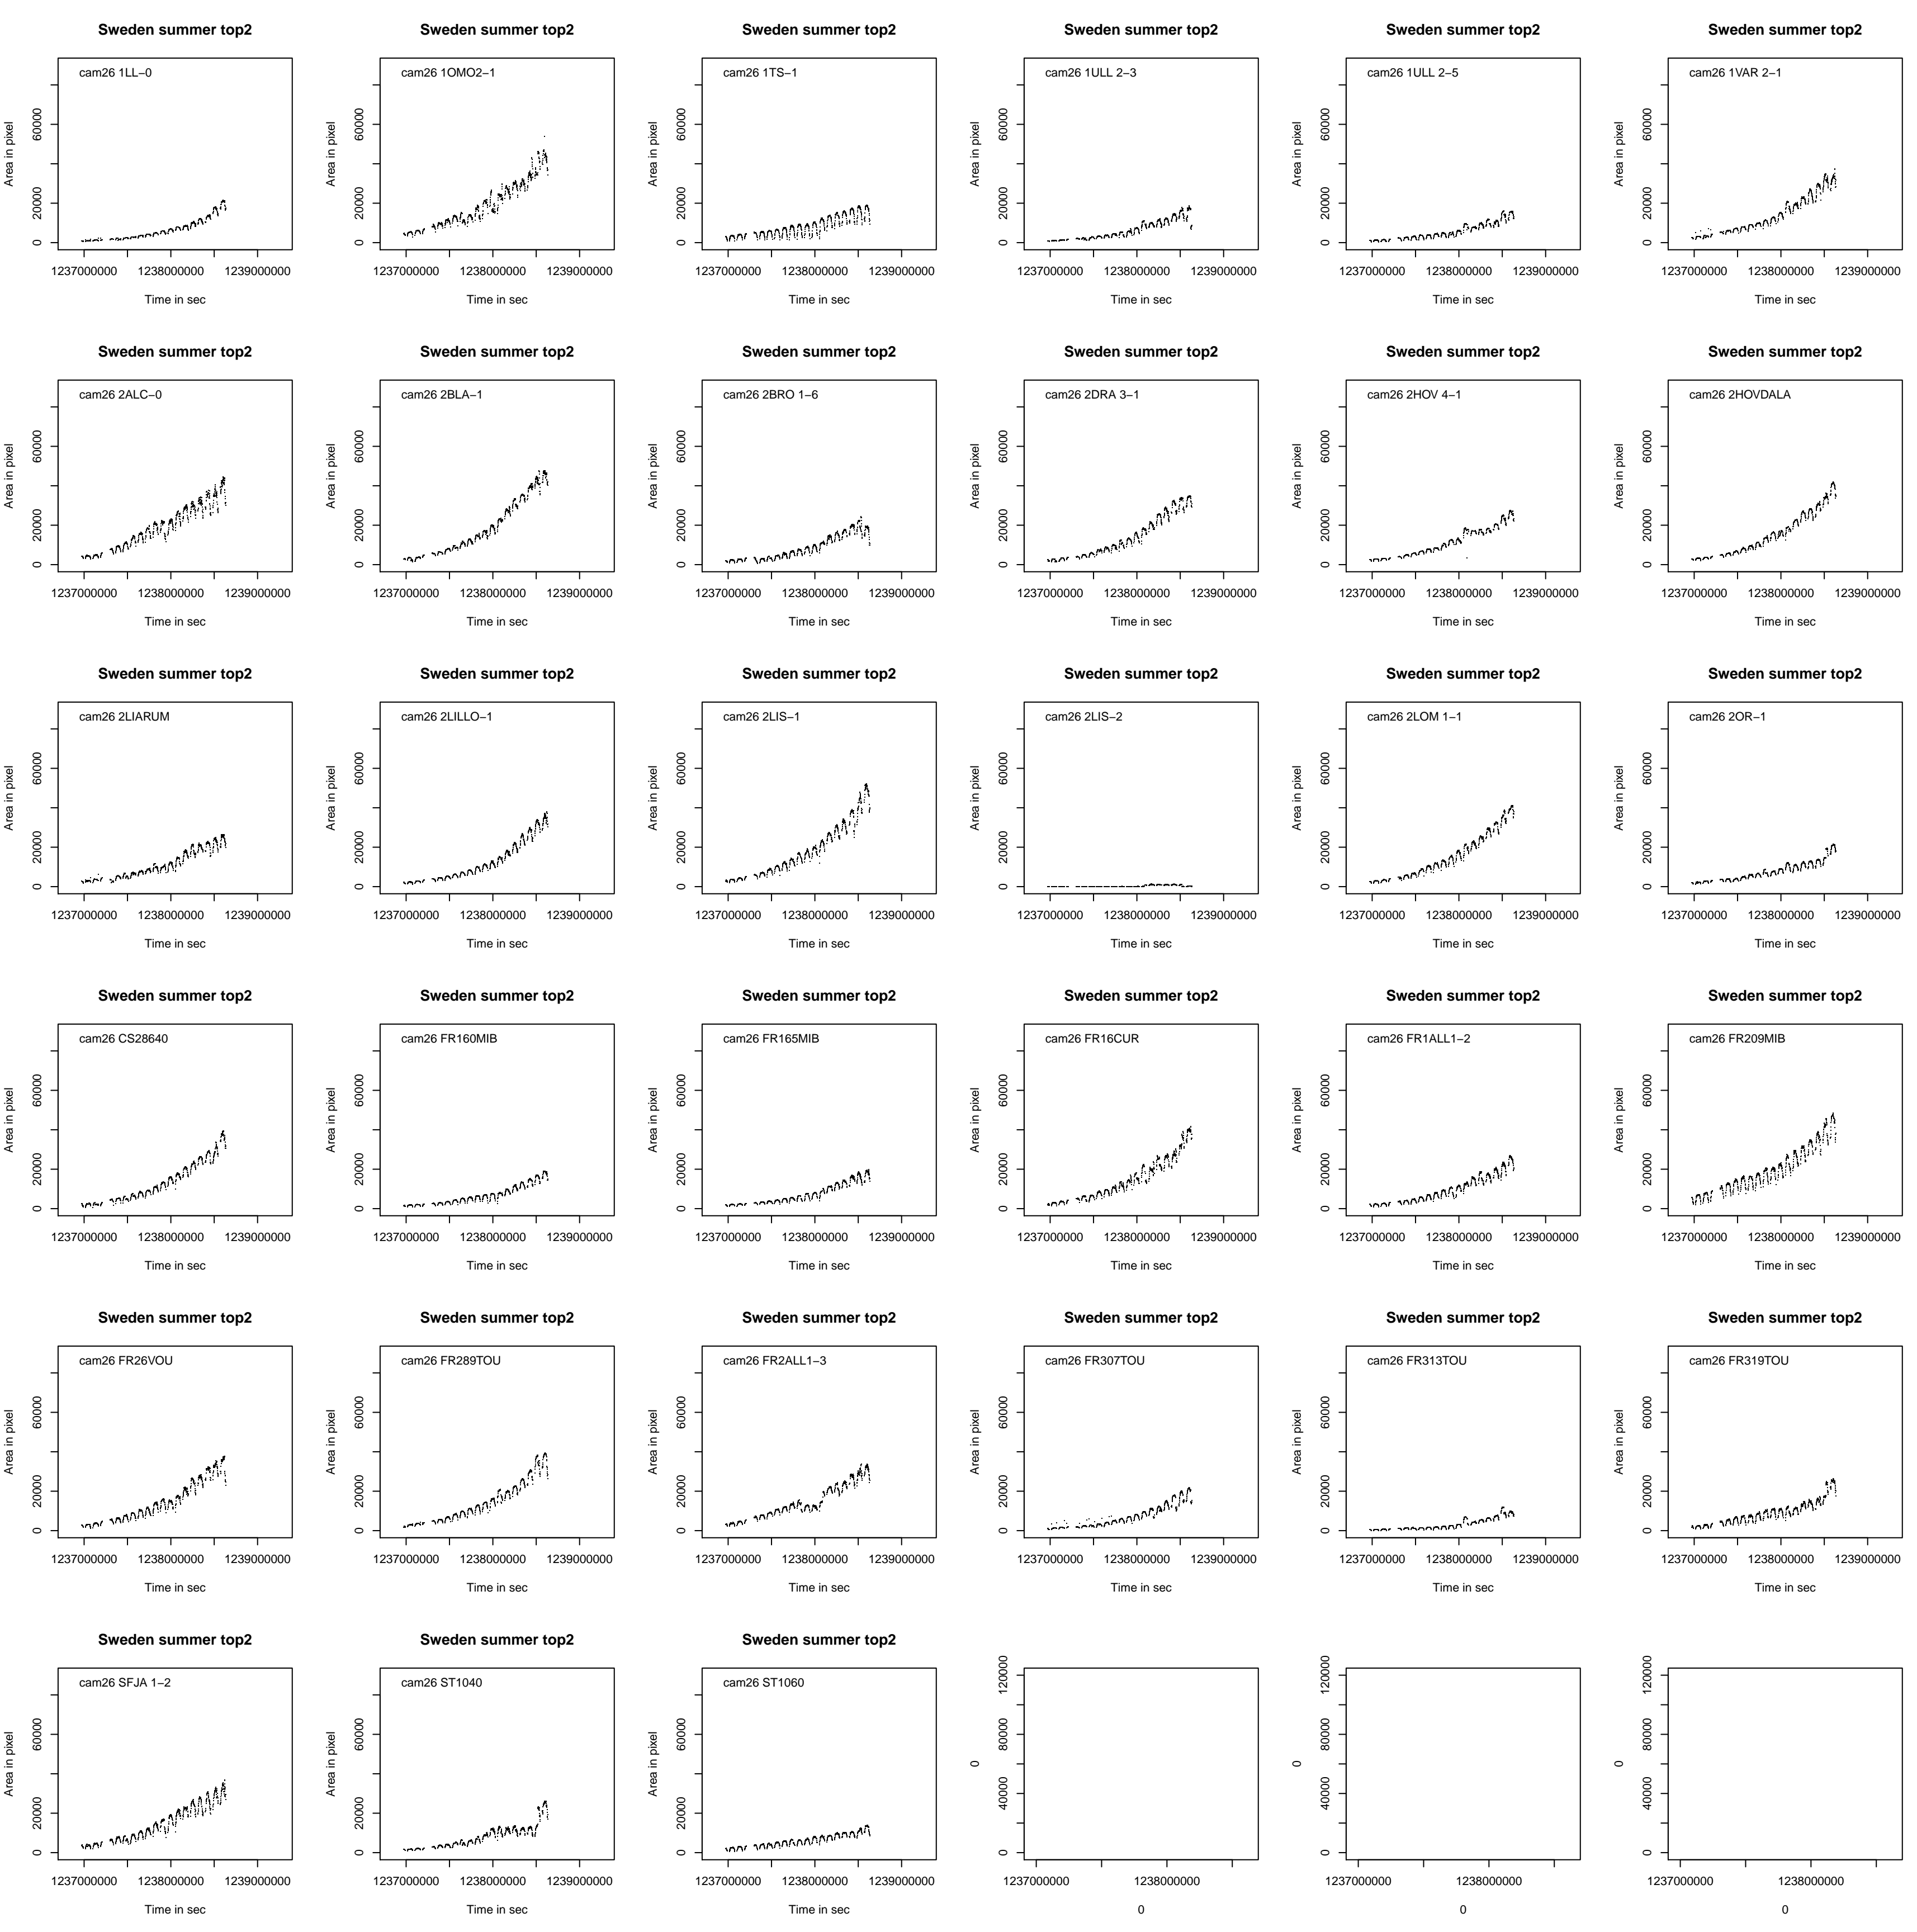

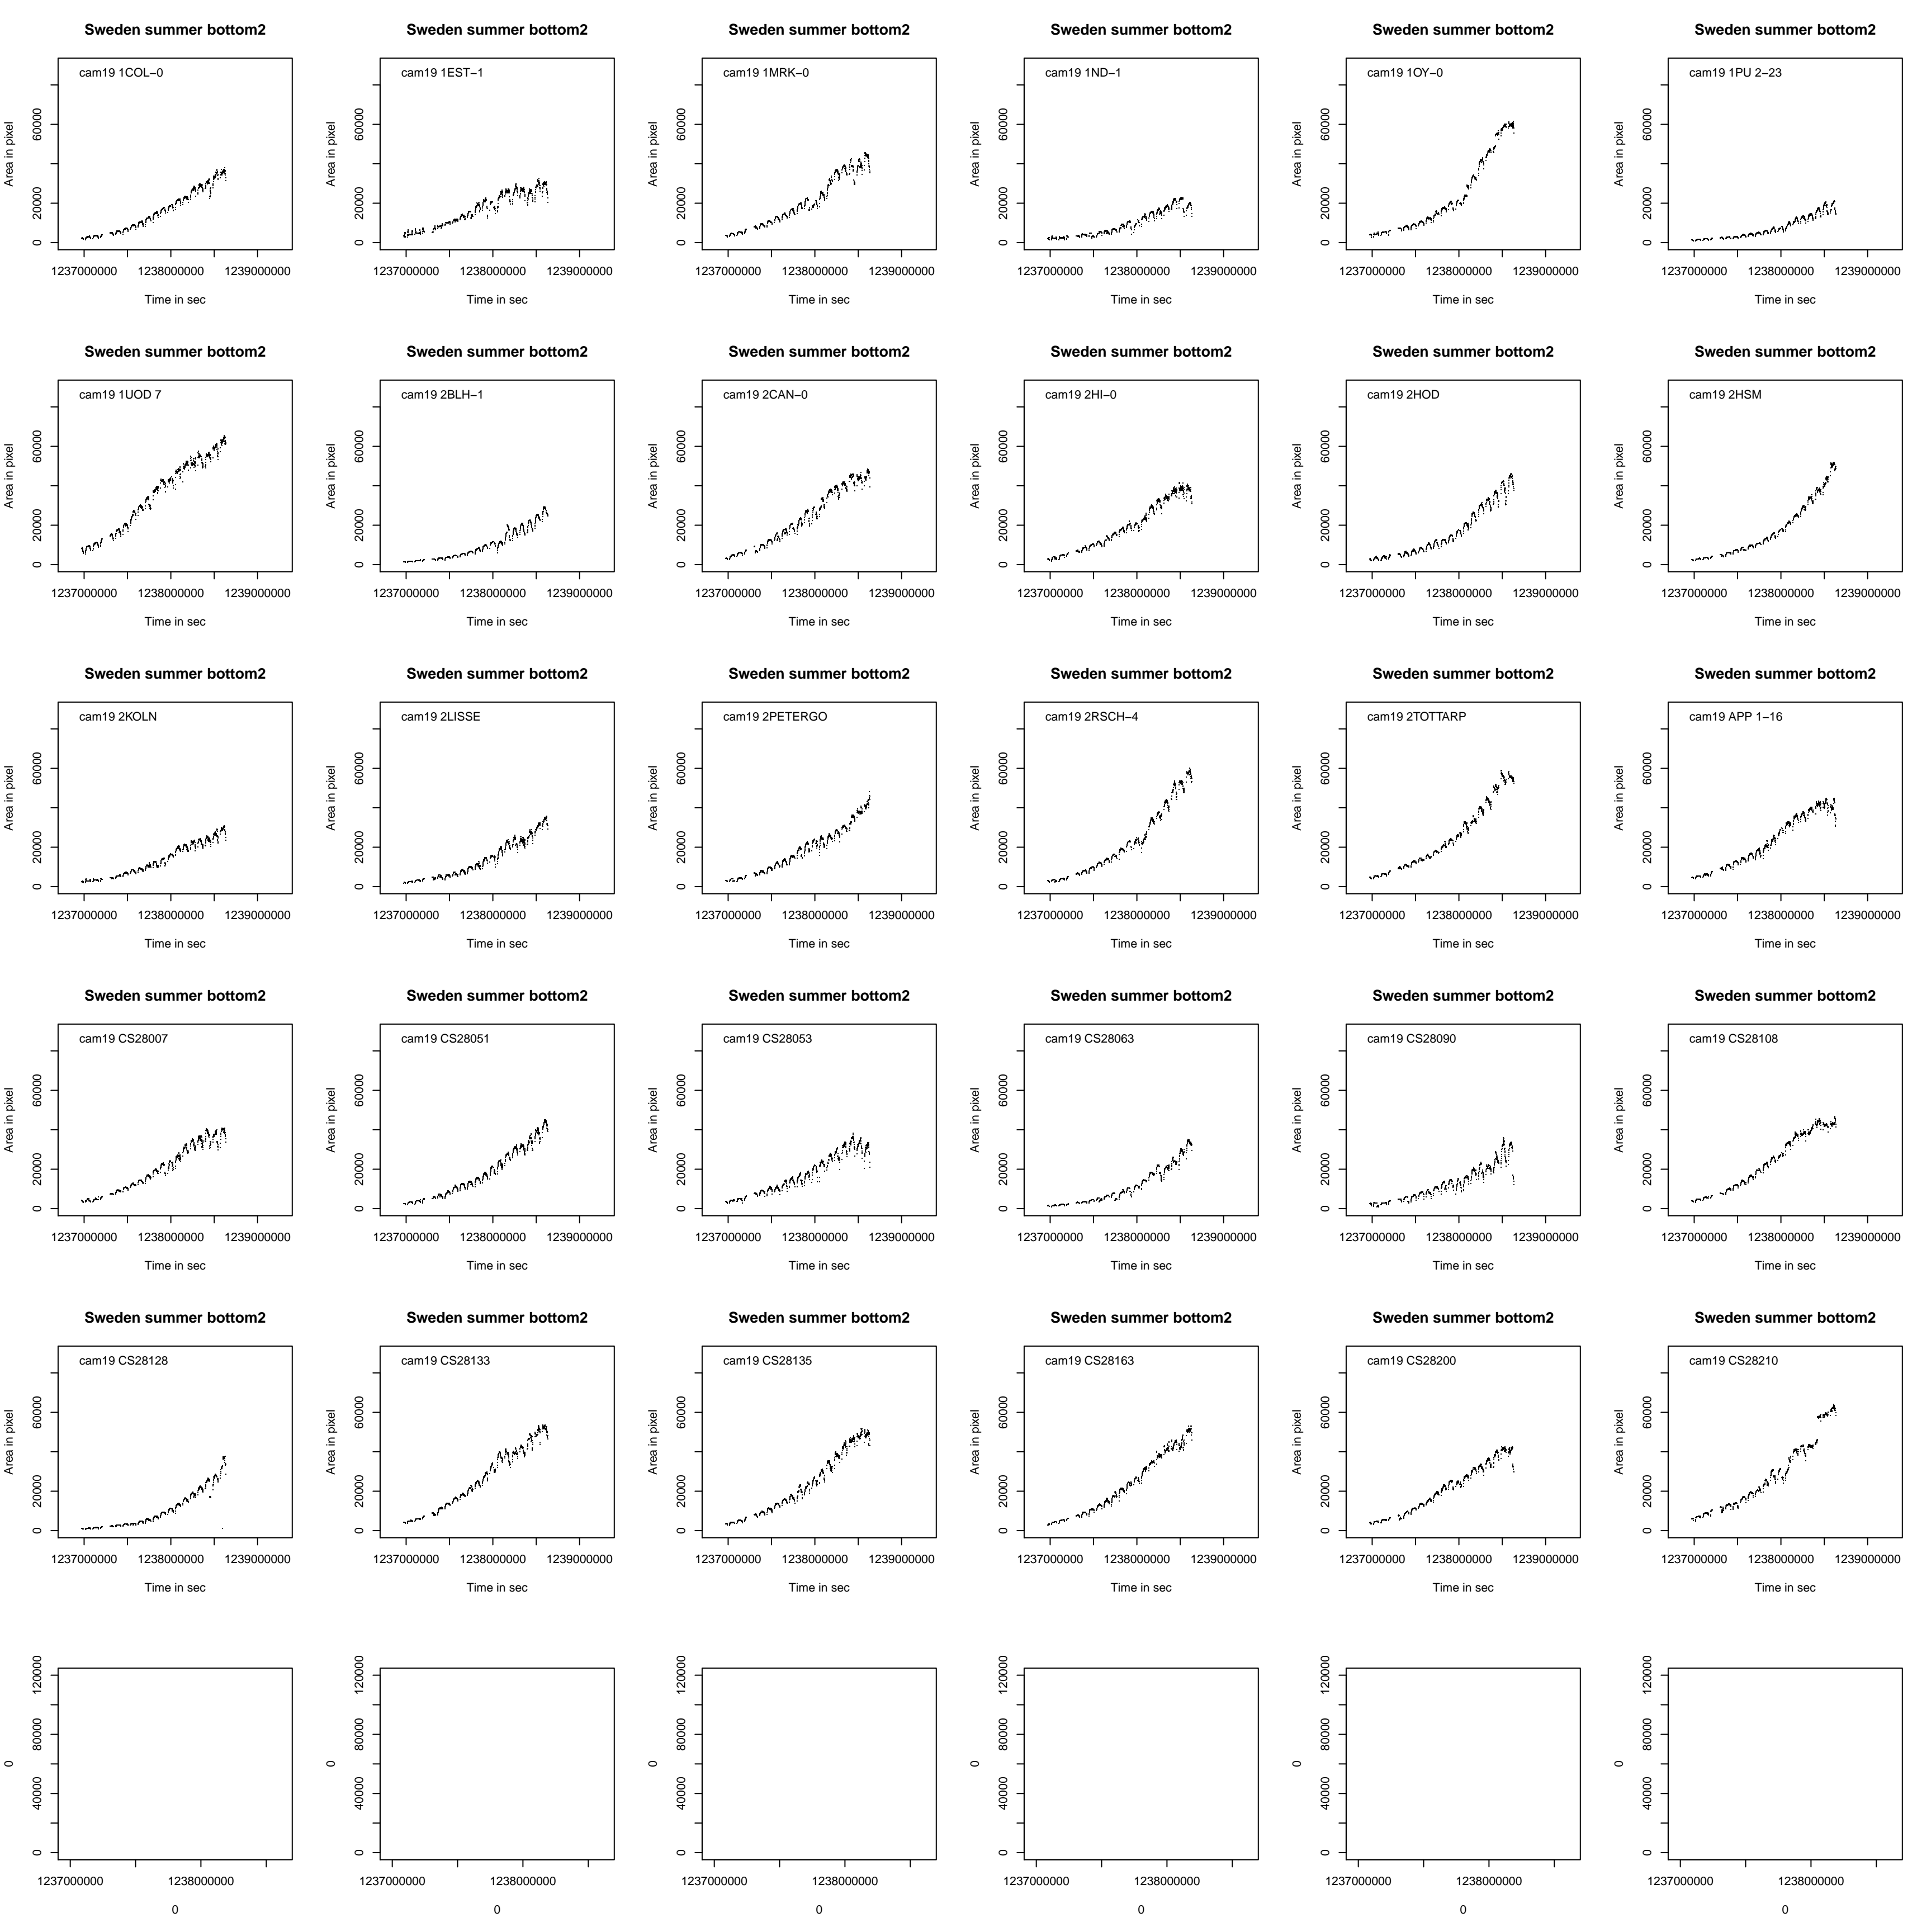

Supplement: supp_2.1.29_FileS2.pdf [file supp_2.1.29_FileS2.pdf]
