# Supplementary material for: Natural Genetic Variation for Growth and Development Revealed by High-Throughput Phenotyping in Arabidopsis thaliana
Source: PubMed Central journal article supplement (PMC3276187; doi:10.1534/g3.111.001487), 2012-01-01
Supplement: supp_2.1.29_FigureS5.pdf [file supp_2.1.29_FigureS5.pdf]

A

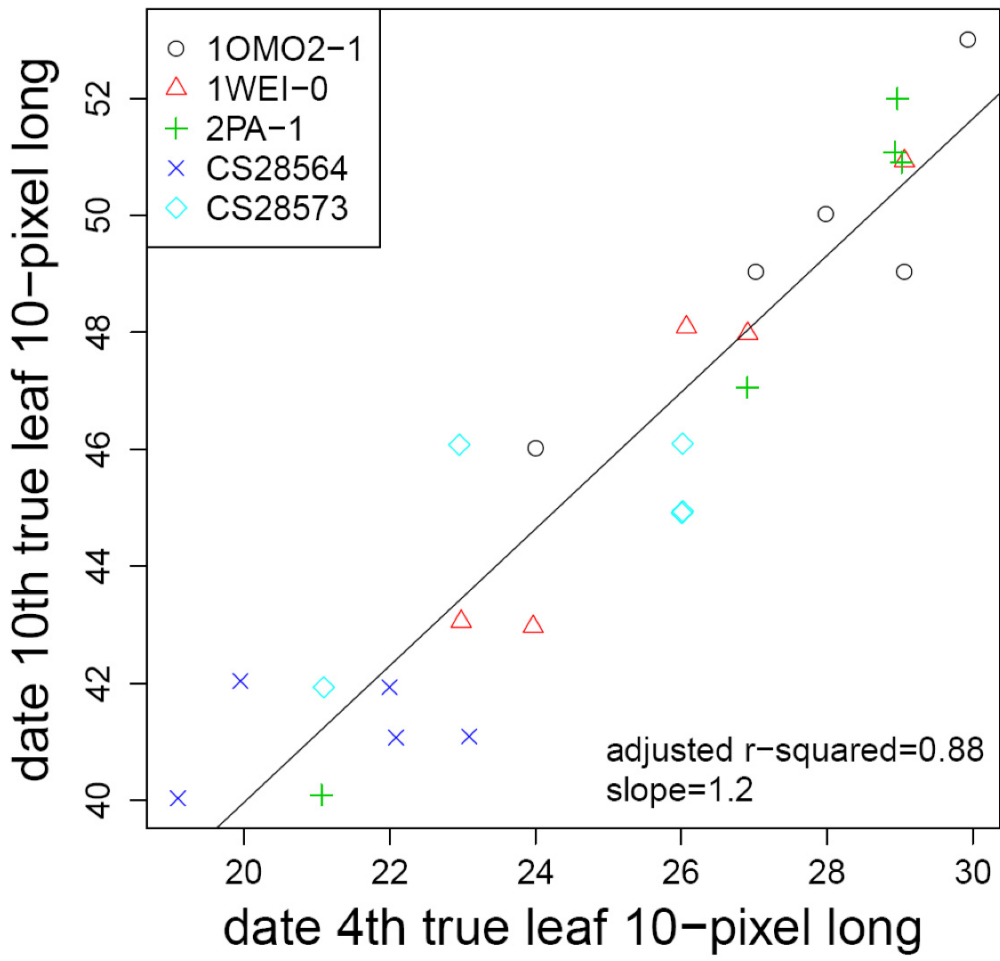

B

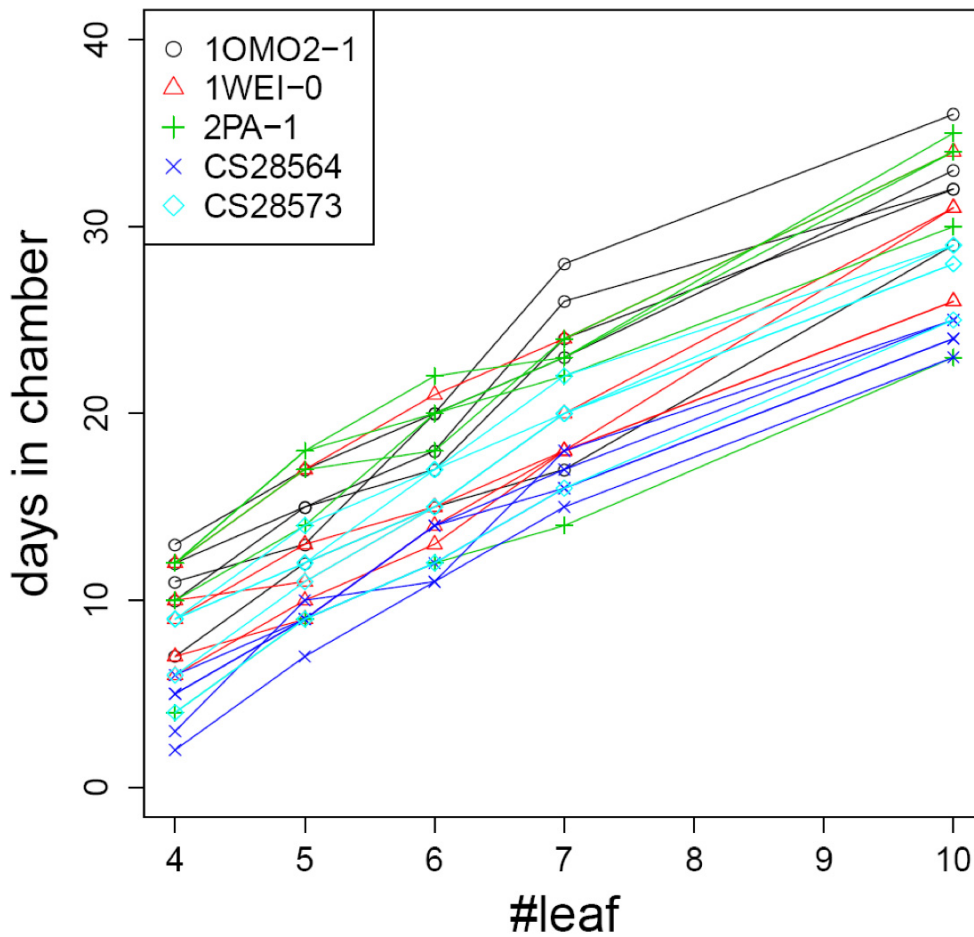

**Figure S5 (A)** . T1.10 is largely explained by T1.04. T1.10 was plotted against T1.04 for each plant. Colors denoted different accessions. The data points were jittered slightly on both x-axis and y-axis to avoid overlap. The adjusted  $r^2$  is 0.88 for the model:  $T1.10 \sim T1.04 + \epsilon$ .

**(B)** Leaf initiation was relatively synchronized once T1.04 was controlled. The number of days plant grown in chamber was plotted against the rosette developmental stage (when a specific leaf is 10-pixel in length). Data were analyzed by a linear model:

$$T_i (i > 1.04) \sim T1.04 + \text{development} + \text{genotype} + \text{development} \times \text{genotype} + \epsilon$$

Where development is a four-level factor including the 1.05, 1.06, 1.07 and 1.10 stages. Variance partitioning of T.1.04 ( 20%), development (76%), genotype ( 0.3%), genotype x development (0.6%).
